# Supplementary material
Source: publisher site journal article supplement (https://www.dovepress.com/article/598731)
Supplement: Supplementary file 1 [file 598731%20Revised%20Supplementary%20Materials.docx]

**Association Between Body Composition and Risk of Type 2 Diabetes Mellitus: A Systematic Review and Meta-Analysis**

Xinrui Cao 1, Guoli Shen 1, Ting Sun 1, *

**Supplementary Information 1: Checklists**

**Table S1** PRISMA (Preferred Reporting Items for Systematic Reviews and Meta-Analyses) 2020 Checklist

**Table S2** MOOSE (Meta-analyses Of Observational Studies in Epidemiology) Checklist

**Supplementary Information 2: Search Strategies**

**Table S3** Search strategies and results

**Supplementary Information 3: Basic Characteristics**

**Table S4** Basic characteristics of the included studies

**Supplementary Information 4: Study Quality Evaluation**

**Table S5** The quality results of cross-sectional studies according to AHRQ

**Table S6** The quality results of cohort studies according to NOS

**Supplementary Information 5: Meta-Analysis Results**

**Figure S1** Body fat percentage (BF%): Qhigh vs Qlow.

**Figure S2** Body fat percentage (BF%): for every increase of 1 unit.

**Figure S3** Body fat mass (BFM): Qhigh vs Qlow.

**Figure S4** Body fat mass (BFM): for every increase of 1 unit.

**Figure S5** Trunk fat mass (TFM): for every increase of 1 unit.

**Figure S6** Leg fat mass (LFM): for every increase of 1 unit.

**Figure S7** Fat mass index (FMI): for every increase of 1 unit.

**Figure S8** Visceral fat area (VFA): Qhigh vs Qlow.

**Figure S9** Visceral fat area (VFA): for every increase of 1 unit.

**Figure S10** Lean mass (LM): for every increase of 1 unit.

**Figure S11** Skeletal muscle mass index (SMI): Qlow vs Qhigh.

**Figure S12** Skeletal muscle mass index (SMI): for every decrease of 1 unit.

**Supplementary Information 6: Subgroup Analyses Results**

**Table S7** Subgroup analyses of outcomes by study type

**Table S8** Subgroup analyses of outcomes by body composition measurement method

**Table S9** Subgroup analyses of outcomes by gender

**Table S10** Subgroup analyses of outcomes by region

**Table S1** PRISMA 2020 checklist

| **Section and Topic** | **Item #** | **Checklist item** | **Location where item is reported** |
| --- | --- | --- | --- |
| **TITLE** | | |  |
| Title | 1 | Identify the report as a systematic review. | Title |
| **ABSTRACT** | | |  |
| Abstract | 2 | See the PRISMA 2020 for Abstracts checklist. | Pg 2-3 |
| **INTRODUCTION** | | |  |
| Rationale | 3 | Describe the rationale for the review in the context of existing knowledge. | Pg 4-5 |
| Objectives | 4 | Provide an explicit statement of the objective(s) or question(s) the review addresses. | Pg 5 |
| **METHODS** | | |  |
| Eligibility criteria | 5 | Specify the inclusion and exclusion criteria for the review and how studies were grouped for the syntheses. | Pg 7-8 |
| Information sources | 6 | Specify all databases, registers, websites, organisations, reference lists and other sources searched or consulted to identify studies. Specify the date when each source was last searched or consulted. | Pg 6-7 |
| Search strategy | 7 | Present the full search strategies for all databases, registers and websites, including any filters and limits used. | Pg 6 and Table S3 |
| Selection process | 8 | Specify the methods used to decide whether a study met the inclusion criteria of the review, including how many reviewers screened each record and each report retrieved, whether they worked independently, and if applicable, details of automation tools used in the process. | Pg 7 |
| Data collection process | 9 | Specify the methods used to collect data from reports, including how many reviewers collected data from each report, whether they worked independently, any processes for obtaining or confirming data from study investigators, and if applicable, details of automation tools used in the process. | Pg 8 |
| Data items | 10a | List and define all outcomes for which data were sought. Specify whether all results that were compatible with each outcome domain in each study were sought (e.g. for all measures, time points, analyses), and if not, the methods used to decide which results to collect. | Pg 7-8 |
| 10b | List and define all other variables for which data were sought (e.g. participant and intervention characteristics, funding sources). Describe any assumptions made about any missing or unclear information. | Pg 7-8 |
| Study risk of bias assessment | 11 | Specify the methods used to assess risk of bias in the included studies, including details of the tool(s) used, how many reviewers assessed each study and whether they worked independently, and if applicable, details of automation tools used in the process. | Pg 9 |
| Effect measures | 12 | Specify for each outcome the effect measure(s) (e.g. risk ratio, mean difference) used in the synthesis or presentation of results. | Pg 9-10 |
| Synthesis methods | 13a | Describe the processes used to decide which studies were eligible for each synthesis (e.g. tabulating the study intervention characteristics and comparing against the planned groups for each synthesis (item #5)). | Pg 9-10 |
| 13b | Describe any methods required to prepare the data for presentation or synthesis, such as handling of missing summary statistics, or data conversions. | Pg 9-10 |
| 13c | Describe any methods used to tabulate or visually display results of individual studies and syntheses. | Pg 10 |
| 13d | Describe any methods used to synthesize results and provide a rationale for the choice(s). If meta-analysis was performed, describe the model(s), method(s) to identify the presence and extent of statistical heterogeneity, and software package(s) used. | Pg 9-10 |
| 13e | Describe any methods used to explore possible causes of heterogeneity among study results (e.g. subgroup analysis, meta-regression). | Pg 9-10 |
| 13f | Describe any sensitivity analyses conducted to assess robustness of the synthesized results. | Pg 10 |
| Reporting bias assessment | 14 | Describe any methods used to assess risk of bias due to missing results in a synthesis (arising from reporting biases). | Pg 10 |
| Certainty assessment | 15 | Describe any methods used to assess certainty (or confidence) in the body of evidence for an outcome. | Not applicable |
| **RESULTS** | | |  |
| Study selection | 16a | Describe the results of the search and selection process, from the number of records identified in the search to the number of studies included in the review, ideally using a flow diagram. | Pg 11  Figure 1 |
| 16b | Cite studies that might appear to meet the inclusion criteria, but which were excluded, and explain why they were excluded. | Pg 11 |
| Study characteristics | 17 | Cite each included study and present its characteristics. | Pg 11-12  Table S4 |
| Risk of bias in studies | 18 | Present assessments of risk of bias for each included study. | Pg 12  Tables S5 and S6 |
| Results of individual studies | 19 | For all outcomes, present, for each study: (a) summary statistics for each group (where appropriate) and (b) an effect estimate and its precision (e.g. confidence/credible interval), ideally using structured tables or plots. | Pg 13-20  Figures 2-8 |
| Results of syntheses | 20a | For each synthesis, briefly summarise the characteristics and risk of bias among contributing studies. | Pg 13-19 |
| 20b | Present results of all statistical syntheses conducted. If meta-analysis was done, present for each the summary estimate and its precision (e.g. confidence/credible interval) and measures of statistical heterogeneity. If comparing groups, describe the direction of the effect. | Pg 13-20  Figures 2-8 Supplementary Information 5 |
| 20c | Present results of all investigations of possible causes of heterogeneity among study results. | Pg 13-19  Supplementary Information 5 |
| 20d | Present results of all sensitivity analyses conducted to assess the robustness of the synthesized results. | Pg 13-19  Supplementary Information 5 |
| Reporting biases | 21 | Present assessments of risk of bias due to missing results (arising from reporting biases) for each synthesis assessed. | Pg 13-14 |
| Certainty of evidence | 22 | Present assessments of certainty (or confidence) in the body of evidence for each outcome assessed. | Not applicable |
| **DISCUSSION** | | |  |
| Discussion | 23a | Provide a general interpretation of the results in the context of other evidence. | Pg 20 |
| 23b | Discuss any limitations of the evidence included in the review. | Pg 23-24 |
| 23c | Discuss any limitations of the review processes used. | Pg 23-24 |
| 23d | Discuss implications of the results for practice, policy, and future research. | Pg 23 |
| **OTHER INFORMATION** | | |  |
| Registration and protocol | 24a | Provide registration information for the review, including register name and registration number, or state that the review was not registered. | Pg 6 |
| 24b | Indicate where the review protocol can be accessed, or state that a protocol was not prepared. | Pg 6 |
| 24c | Describe and explain any amendments to information provided at registration or in the protocol. | Pg 6 |
| Support | 25 | Describe sources of financial or non-financial support for the review, and the role of the funders or sponsors in the review. | Pg 25 |
| Competing interests | 26 | Declare any competing interests of review authors. | Pg 25 |
| Availability of data, code and other materials | 27 | Report which of the following are publicly available and where they can be found: template data collection forms; data extracted from included studies; data used for all analyses; analytic code; any other materials used in the review. | Supplementary Materials |

**Table S2** MOOSE checklist

| **Reporting Criteria** | **Reported (Yes/No)** | **Reported on Page No.** |
| --- | --- | --- |
| **Reporting of Background** |  |  |
| Problem definition | Yes | 4-5 |
| Hypothesis statement | Yes | 5 |
| Description of Study Outcome(s) | Yes | 5 |
| Type of exposure or intervention used | Yes | 4-5 |
| Type of study design used | Yes | 5 |
| Study population | Yes | 4-5 |
| **Reporting of Search Strategy** |  |  |
| Qualifications of searchers (eg, librarians and investigators) | Yes | 6 |
| Search strategy, including time period included in the synthesis and keywords | Yes | 6, Table S3 |
| Effort to include all available studies, including contact with authors | Yes | 6-8 |
| Databases and registries searched | Yes | 6-7 |
| Search software used, name and  version, including special features used (eg, explosion) | Yes | 6-7 |
| Use of hand searching (eg, reference lists of obtained articles) | Yes | 6-7 |
| List of citations located and those  excluded, including justification | Yes | 7-8 |
| Method for addressing articles  published in languages other than  English | Yes | 8 |
| Method of handling abstracts and  unpublished studies | Yes | 8 |
| Description of any contact with authors | Yes | 8 |
| **Reporting of Methods** |  |  |
| Description of relevance or  appropriateness of studies assembled for assessing the hypothesis to be tested | Yes | 9 |
| Rationale for the selection and coding of data (eg, sound clinical principles or convenience) | Yes | 8 |
| Documentation of how data were  classified and coded (eg, multiple raters, blinding, and interrater reliability) | Yes | 8-10 |
| Assessment of confounding (eg,  comparability of cases and controls in studies where appropriate | Yes | 9-10 |
| **Reporting Criteria** |  |  |
| Assessment of study quality, including blinding of quality assessors; stratification or regression on possible predictors of study results | Yes | 9 |
| Assessment of heterogeneity | Yes | 9-10 |
| Description of statistical methods (eg, complete description of fixed or random effects models, justification of whether the chosen models account for predictors of study results, dose-response models, or cumulative meta-analysis) in sufficient detail to be replicated | Yes | 9-10 |
| Provision of appropriate tables and  graphics | Yes | Figures 2-8, Supplementary Materials |
| **Reporting of Results** |  |  |
| Table giving descriptive information for each study included | Yes | Table S4 |
| Results of sensitivity testing (eg,  subgroup analysis) | Yes | 13-19, Supplementary Information 5 |
| Indication of statistical uncertainty of findings | Yes | 19-20 |
| **Reporting of Discussion** |  |  |
| Quantitative assessment of bias (eg, publication bias) | Yes | 21-23 |
| Justification for exclusion (eg, exclusion of non-English-language citations) | Yes | 24 |
| Assessment of quality of included studies | Yes | 21 |
| **Reporting of Conclusions** |  |  |
| Consideration of alternative explanations for observed results | Yes | 23 |
| Generalization of the conclusions (ie,  appropriate for the data presented and  within the domain of the literature review) | Yes | 24 |
| Guidelines for future research | Yes | 23 |
| Disclosure of funding source | Yes | 25 |

**Table S3** Search strategies and results

| **Databases** | **Search strategies and results** |
| --- | --- |
| **PubMed** | #1: "Body Composition"[Mesh]—69,124 |
| #2: (((((((((((((("Composition*, Body"[Title/Abstract]) OR ("body fat mass"[Title/Abstract])) OR ("trunk fat mass"[Title/Abstract])) OR ("Leg fat mass"[Title/Abstract])) OR ("fat mass index"[Title/Abstract])) OR ("body fat percentage"[Title/Abstract])) OR ("visceral fat mass"[Title/Abstract])) OR ("subcutaneous fat mass"[Title/Abstract])) OR ("visceral adipose tissue"[Title/Abstract])) OR ("fat free mass"[Title/Abstract])) OR ("muscle mass"[Title/Abstract])) OR ("lean mass"[Title/Abstract])) OR ("skeletal muscle mass"[Title/Abstract])) OR ("Skeletal muscle mass index"[Title/Abstract])) OR ("Appendicular skeletal muscle mass index"[Title/Abstract])—65,039 |
| #3: #1 OR #2—112,208 |
| #4: "Diabetes Mellitus, Type 2"[Mesh]—193,037 |
| #5: (((Diabetes Mellitus, Noninsulin Dependent[Title/Abstract]) OR (Diabetes Mellitus, Adult-Onset[Title/Abstract])) OR (Diabetes Mellitus, Type II[Title/Abstract])) OR (Type 2 Diabetes Mellitus[Title/Abstract])—77,226 |
| #6: #4 OR #5—216,181 |
| #7: #3 AND #6—4,708 |
| **Embase** | #1: 'non insulin dependent diabetes mellitus'/mj—217,228 |
| #2: 'diabetes mellitus, type 2':ti,ab,kw OR 'diabetes mellitus, noninsulin dependent':ti,ab,kw OR 'diabetes mellitus, adult-onset':ti,ab,kw OR 'diabetes mellitus, type ii':ti,ab,kw OR 'type 2 diabetes mellitus':ti,ab,kw—129,071 |
| #3: #1 OR #2—256,854 |
| #4: 'body composition'/mj—27,767 |
| #5: 'composition*, body':ti,ab,kw OR 'body fat mass':ti,ab,kw OR 'trunk fat mass':ti,ab,kw OR 'leg fat mass':ti,ab,kw OR 'fat mass index':ti,ab,kw OR 'body fat percentage':ti,ab,kw OR 'visceral fat mass':ti,ab,kw OR 'subcutaneous fat mass':ti,ab,kw OR 'visceral fat weight':ti,ab,kw OR 'fat free mass':ti,ab,kw OR 'muscle mass':ti,ab,kw OR 'lean mass':ti,ab,kw OR 'skeletal muscle mass':ti,ab,kw OR 'skeletal muscle mass index':ti,ab,kw OR 'appendicular skeletal muscle mass index':ti,ab,kw—85,742 |
| #6: #4 OR #5—102,367 |
| #7: #3 AND #6—2,441 |
| **Web of science** | #1: ((((TS=("Diabetes Mellitus, Type 2")) OR TS=(Diabetes Mellitus, Noninsulin Dependent)) OR TS=(Diabetes Mellitus, Adult-Onset)) OR TS=(Diabetes Mellitus, Type II)) OR TS=(Type 2 Diabetes Mellitus)—160,757 |
| #2: (((((((((((((((TS=("Composition*, Body")) OR TS=("Body Composition")) OR TS=("body fat mass")) OR TS=("trunk fat mass")) OR TS=("Leg fat mass")) OR TS=("fat mass index")) OR TS=("body fat percentage")) OR TS=("visceral fat mass")) OR TS=("subcutaneous fat mass")) OR TS=("visceral adipose tissue")) OR TS=("fat free mass")) OR TS=("muscle mass")) OR TS=("lean mass")) OR TS=("skeletal muscle mass")) OR TS=("Skeletal muscle mass index")) OR TS=("Appendicular skeletal muscle mass index")—140,265 |
| #3: #1 AND #2—3,612 |
| **Cochrane Library** | #1: MeSH descriptor: [Body Composition] explode all trees—7,221 |
| #2: (Composition*, Body):ti,ab,kw OR ("body fat mass"):ti,ab,kw OR ("trunk fat mass"):ti,ab,kw OR ("Leg fat mass"):ti,ab,kw OR ("fat mass index"):ti,ab,kw OR ("body fat percentage"):ti,ab,kw OR ("visceral fat mass"):ti,ab,kw OR ("subcutaneous fat mass"):ti,ab,kw OR ("fat free mass"):ti,ab,kw OR ("muscle mass"):ti,ab,kw OR ("lean mass"):ti,ab,kw OR ("skeletal muscle mass"):ti,ab,kw OR ("Skeletal muscle mass index"):ti,ab,kw OR ("Appendicular skeletal muscle mass index"):ti,ab,kw—13,588 |
| #3: #1 OR #2—17,920 |
| #4: MeSH descriptor: [Diabetes Mellitus, Type 2] this term only—26,989 |
| #5: ("diabetes mellitus, noninsulin dependent"):ti,ab,kw OR ("Diabetes Mellitus, Adult-Onset"):ti,ab,kw OR ("Diabetes Mellitus, Type II"):ti,ab,kw OR ("Type 2 Diabetes Mellitus"):ti,ab,kw—17,959 |
| #6: #4 OR #5—37,149 |
| #7: #3 AND #6—881 |
| **Scopus** | #1: (TITLE-ABS-KEY ("Body Composition") OR TITLE-ABS-KEY ("Composition*, Body") OR TITLE-ABS-KEY ("body fat mass") OR TITLE-ABS-KEY ("trunk fat mass") OR TITLE-ABS-KEY ("Leg fat mass") OR TITLE-ABS-KEY ("fat mass index") OR TITLE-ABS-KEY ("body fat percentage") OR TITLE-ABS-KEY ("visceral fat mass") OR TITLE-ABS-KEY ("subcutaneous fat mass") OR TITLE-ABS-KEY ("fat free mass") OR TITLE-ABS-KEY ("muscle mass") OR TITLE-ABS-KEY ("lean mass") OR TITLE-ABS-KEY ("skeletal muscle mass") OR TITLE-ABS-KEY ("Skeletal muscle mass index") OR TITLE-ABS-KEY("Appendicular skeletal muscle mass index"))—160,445 |
| #2: (TITLE-ABS-KEY ("Diabetes Mellitus, Type 2") OR TITLE-ABS-KEY ("diabetes mellitus, noninsulin dependent") OR TITLE-ABS-KEY ("Diabetes Mellitus, Adult-Onset") OR TITLE-ABS-KEY ("Diabetes Mellitus, Type II") OR TITLE-ABS-KEY ("Type 2 Diabetes Mellitus"))—212,771 |
| #3: #1 AND #2—4,878 |
| **CNKI** | #1：主题："2型糖尿病" + "成人发病型糖尿病" + "糖尿病2型" + "非胰岛素依赖性糖尿病" + "非胰岛素依赖型糖尿病" + "二型糖尿病"（精确） |
| #2：主题："身体成分" + "体脂量" + "躯干脂肪" + "腿部脂肪" + "脂肪质量指数" + "体脂率" + "内脏脂肪" + "皮下脂肪量" + "无脂肪量" + "肌肉量" + "瘦体重" + "骨骼肌量" + "骨骼肌质量指数" + "四肢骨骼肌质量指数"（精确） |
| #3：#1 AND #2—1,095 |
| **Wanfang** | #1：主题："2型糖尿病" OR "成人发病型糖尿病" OR "糖尿病2型" OR "非胰岛素依赖性糖尿病" OR "非胰岛素依赖型糖尿病" OR "二型糖尿病" |
| #2：主题："身体成分" OR "体脂量" OR "躯干脂肪" OR "腿部脂肪" OR "脂肪质量指数" OR "体脂率" OR "内脏脂肪" OR "皮下脂肪量" OR "无脂肪量" OR "肌肉量" OR "瘦体重" OR "骨骼肌量" OR "骨骼肌质量指数" OR "四肢骨骼肌质量指数" |
| #3：#1 AND #2—1,022 |
| **VIP** | #1:题名或关键词："2型糖尿病"+"成人发病型糖尿病"+"糖尿病2型"+"非胰岛素依赖性糖尿病"+"非胰岛素依赖型糖尿病"+"二型糖尿病" |
| #2:题名或关键词："身体成分"+"体脂量"+"躯干脂肪"+"腿部脂肪"+"脂肪质量指数"+"体脂率"+"内脏脂肪"+"皮下脂肪量"+"无脂肪量"+"肌肉量"+"瘦体重" +"骨骼肌量"+"骨骼肌质量指数"+"四肢骨骼肌质量指数" |
| #3: #1 AND #2—407 |

**Table S4** Basic characteristics of the included studies

| **Study** | **Location**  **(State)** | **Study design** | **Sample size** | **No. of T2DM case** | **Body composition indicators** | **Measure--ment tools** | **Adjustment factors** | **Effect size: ORs/RRs/HRs (95%CI)** |
| --- | --- | --- | --- | --- | --- | --- | --- | --- |
| Tulloch-Reid  200318 | United States (North America) | Cohort study | 1,614 | 322 | BF% | BIA | Age. | For every increase of 1 SD:  Men:1.62 (1.32-1.99)  Women:1.58 (1.34-1.83) |
| Ley  200914 | Canada  (North America) | Cohort study | 492 | 86 | BF% | BIA | Sex, Age. | For every increase of 2 unit:  1.16 (1.09-1.24) |
| Lee  200917 | United States (North America) | Cohort study | 14,006 | 447 | BF% | Hydrodensitometry weighing | Age, Examination year, Parental diabetes, Smoking, Alcohol consumption, Systolic and diastolic blood pressure, Total cholesterol, IFG, BMI, Treadmill time. | Over vs. Normal:1.27 (1.02-1.58) |
| Larsen  201632 | United States (North America) | Cohort study | 2,166 | 265 | LM | DXA | Age, Race, Clinical site, total abdominal area, total thigh area, Physical activity, Smoking, Lipids, Hypertension, BMI, Visceral fat, Body fat. | For every increase of 1 SD:  Men:0.84 (0.66-1.07)  Women:0.96 (0.75-1.25) |
| Lv  201738 | China  (Asia) | Cross-sectional study | 4,126 | 1,311 | VFA | BIA | Age, Smoking, Drinking status, Physical activity, Family history of diabetes, Systolic blood pressure, TG, TC, HDL-C, LDL-C, hs-CRP, BMI. | For every increase of 1 SD:  Men:1.03 (0.89-1.19)  Women:1.45 (1.26-1.67) |
| Choi  201745 | Korea  (Asia) | Cross-sectional study | 6,675 | 982 | 1.TFM  2.LFM | DXA | BMI, ASM, Smoking, Exercise, Cholesterol, TG, Blood pressure, Energy intake, Hormone replacement therapy status (women). | For every increase of 1 unit:  1.Men:1.15 (1.05-1.25) Women:1.19 (1.11-1.28)  2.Men:0.49 (0.40-0.59) Women:0.56 (0.49-0.63) |
| Son  201721 | Korea  (Asia) | Cohort study | 6,895 | 1,336 | MMI | BIA | Age, Area, Family history of diabetes, Hypertension, Smoking, Alcohol consumption, Education level, Physical activity, Monthly income, Caloric intake. | Q1 vs. Q3:2.05 (1.73-2.43)  Q2 vs. Q3:1.39 (1.17-1.66)  For every decrease of 1 SD:1.35 (1.26-1.45) |
| Hong  201727 | Korea  (Asia) | Cohort study | 203,767 | 4,264 | 1.SMI  2.BF% | BIA | Age, Study center, Year of screening exam, Smoking, Alcohol intake, Physical activity, Education level, Total calorie intake, History of cardiovascular disease, History of hypertension, Medication for dyslipidemia, Family history of T2DM, Menopause (only for women), HOMA-IR, Fasting glucose, hs-CRP. | 1.Men: For every decrease of 1 SD:1.38 (1.32-1.43)  Q1 vs. Q4:2.21 (1.94-2.51)  Q2 vs. Q4:1.63 (1.42-1.86)  Q3 vs. Q4:1.32 (1.14-1.52)  Women: For every decrease of 1 SD:1.25 (1.19-1.32)  Q1 vs. Q4:1.96 (1.51-2.53)  Q2 vs. Q4:1.46 (1.11-1.91)  Q3 vs. Q4:1.18 (0.88-1.58)  2. Q2 vs. Q1:0.9167 (0.7684-1.0933)  Q3 vs. Q1:0.8819 (0.7395-1.0517)  Q4 vs. Q1:0.6944 (0.6098-0.7874) |
| Tatsukawa  201831 | Japan  (Asia) | Cohort study | 1,532 | 212 | 1.TF%  2.LF%  3.ALM  4.ALM/height² | DXA | BMI, Dyslipidemia, Hypertension, Alcohol drinking status, Radiation dose. | For every increase of 1 SD:  1.Men:1.58 (1.10-2.28) Women:1.34 (0.99-1.83)  2.Men:0.68 (0.50-0.91) Women:0.68 (0.55-0.85)  3.Men:0.97 (0.73-1.29) Women:1.04 (0.85-1.28)  4.Men:0.86 (0.62-1.20) Women:1.07 (0.84-1.36) |
| Granados  201820 | United States (North America) | Cohort study | 3,170 | 436 | VAT | CT | Age, Race, Sex, Center, Height, Smoking, Hypertension, High cholesterol. | For every increase of 1 SD:2.70 (2.36-3.09) |
| Park  201822 | Korea  (Asia) | Cohort study | 5,972 | 1,148 | BF% | BIA | Age, Study area, Hypertension, Regular exercise, Smoking, Alcohol intake, HOMA-IR, hs-CRP, HDL-C, TG. | Men:  Q2 vs. Q1:1.16 (0.83-1.60) Q3 vs. Q1:1.27 (0.92-1.76)  Q4 vs. Q1:1.81 (1.33-2.46) Q5 vs. Q1:2.14 (1.57-2.90)  Women:  Q2 vs. Q1:1.15 (0.85-1.56) Q3 vs. Q1:1.10 (0.81-1.49)  Q4 vs. Q1:1.44 (1.07-1.93) Q5 vs. Q1:1.47 (1.09-1.98) |
| Lee  201823 | United States (North America) | Cohort study | 97,111 | 7,993 | 1.BFM  2.BF%  3.FMI | Prediction equation | Age, Race, Family history of diabetes, Alcohol consumption, Calorie intake, Smoking, Physical activity, Dietary factors; Menopause status and Postmenopausal hormone use (Women). | 1.Men: For every increase of 1 SD:1.70 (1.66-1.75)  Q2 vs. Q1:1.96 (1.61-2.40) Q3 vs. Q1:2.96 (2.45-3.58)  Q4 vs. Q1:3.90 (3.25-4.69) Q5 vs. Q1:8.38 (7.02-10.0)  Women: For every increase of 1 SD:1.71 (1.68-1.74)  Q2 vs. Q1:2.20 (1.86-2.61) Q3 vs. Q1:3.50 (2.99-4.11)  Q4 vs. Q1:5.73 (4.92-6.67) Q5 vs. Q1:12.1 (10.4-14.0)  2.For every increase of 1 SD:  Men:1.58 (1.54-1.62) Women:1.76 (1.73-1.80)  3.For every increase of 1 SD:  Men:1.64 (1.59-1.68) Women:1.69 (1.66-1.72) |
| Gamboa-Gómez 201947 | Mexica  (North America) | Cross-sectional study | 875 | 71 | 1.BFM  2.LM | BIA | Sex, Age. | For every increase of 1 unit:  1.1.08 (1.01-1.10)  2.0.99 (0.96-1.02) |
| Chi  201941 | Korea  (Asia) | Cross-sectional study | 7,835 | 1,313 | 1.TFM  2.LFM  3.BFM | DXA | Age, BMI. | For every increase of 1 SD:  1.Men:1.436 (1.237-1.667) Women:1.741 (1.480-2.047)  2.Men: Left leg fat:0.639 (0.563-0.724)  Right leg fat:0.657 (0.579-0.745)  Women: Left leg fat:0.367 (0.321-0.419)  Right leg fat:0.375 (0.329-0.428)  3.Men:1.049 (0.907-1.214) Women:0.793 (0.674-0.934) |
| Kim  201930 | Korea  (Asia) | Cohort study | 17,280 | 762 | FMI | BIA | Age, Physical activity, Smoking, Alcohol drinking, Family history of diabetes, Systolic blood pressure, Baseline HbA1c, HOMR-IR, HOMA-β, Serum cholesterol, TG, HDL-C. | For every increase of 1 unit:  Men:  Non-obese:1.07 (0.82-1.39) Obese:1.31 (1.17-1.46)  Women:  Non-obese:0.96 (0.76-1.21) Obese:1.08 (0.85-1.37) |
| Han  201942 | United Kingdom (Europe) | Cross-sectional study | 58,128 | 2,575 | BF% | Prediction equation | Age, Sex, Smoking, Ethnicity, Survey year, Country. | Q2 vs. Q1:1.81 (1.34-2.46) Q3 vs. Q1:2.81 (2.11-3.74)  Q4 vs. Q1:4.70 (3.55-6.22) Q5 vs. Q1:11.05 (8.38-14.57) |
| Escobedo-de la Peña  202043 | Mexica  (Northern America) | Cross-sectional study | 1,840 | 211 | BF% | BIA | Age, Triglycerides, Blood pressure, Waist circumference, BMI, Sex. | Q2 vs. Q1:1.5 (0.9-2.6)  Q3 vs. Q1:3.0 (1.4-6.4) |
| Zafra-Tanaka 202019 | Peru  (South America) | Cohort study | 2,510 | 118 | BF% | BIA | Sex, Age, Study site, Smoking, Alcohol dependence, Physical activity, History of hypertension, Plasma glucose levels at baseline, Family history of DM2. | For every increase of 1 unit:1.03 (0.98-1.07) |
| Chen  202044 | China  (Asia) | Cross-sectional study | 3,367 | 422 | 1.BF%  2.VFA | BIA | Age, Sex, BMI. | 1.Over vs. Normal or low:1.62 (1.01-2.68)  2.For every increase of 1 unit:1.01 (1.01-1.02) |
| Cheng  202149 | China  (Asia) | Cross-sectional study | 1,370 | 274 | 1.1/TFM  2.1/BFM | BIA | Age, Sex, Physical activity, Smoking status, Drinking, Individual history of disease, Energy intake, Alone status, Household income, Marital status, Education level, Employment status, Depressive symptoms, Dietary patterns. | 1. Q2 vs. Q1:0.99 (0.68-1.43)  Q3 vs. Q1:0.86 (0.57-1.29)  Q4 vs. Q1:0.86 (0.58-1.29)  2. Q2 vs. Q1:0.78 (0.54-1.13)  Q3 vs. Q1:0.88 (0.60-1.28)  Q4 vs. Q1:0.64 (0.42-0.96) |
| Yokokawa  202135 | Japan  (Asia) | Cross-sectional study | 1,907 | 237 | VFA | CT | Age, Dyslipidemia, Hypertension, Hyperuricemia, Alcohol consumption, Smoking. | Men: Q2 vs. Q1:1.13 (0.6-2.13)  Q3 vs. Q1:1.67 (0.88-3.16) Q4 vs. Q1:1.94 (1.02-3.71)  Women:  Q2 vs. Q1:1.05 (0.23-4.87) Q3 vs. Q1:2.35 (0.56-9.84)  Q4 vs. Q1:6.15 (1.65-22.99) |
| Chiba  202148 | Japan  (Asia) | Cross-sectional study | 2,850 | 88 | VFA | BIA | Age, Comorbidities, BMI, SMI, BF%, Grip strength, Walking speed, Smoking status, Alcohol drinking status, Sports habits, Laboratory data. | For every increase of 10 unit:  Men:1.18 (1.06-1.31)  Women:1.17 (1.02-1.34) |
| Wang  202125 | United Kingdom (Europe) | Cohort study | 464,817 | 11,618 | 1.FMR  2.Arm FMR  3.Leg FMR  4.Trunk FMR | BIA | Age, Ethnicity, Education, Townsend index, Smoking, Drinking, Physical activity, Dietary, Oily and non‐oily fish intake, Urinary sodium, Processed meat intake, Systolic blood pressure, Cholesterol, Blood pressure‐lowering medications, Cholesterol‐lowering medications, BMI. | For every increase of 1 SD:  1.Men:1.45 (1.39–1.53) Women:1.23 (1.16–1.30)  2.Men:1.14 (1.09-1.19) Women:1.37 (1.26-1.49)  3.Men:1.34 (1.30-1.39) Women:1.67 (1.55-1.80)  4.Men:1.38 (1.32-1.45) Women:1.11 (1.11-1.12) |
| Liu  202229 | China  (Asia) | Cohort study | 687 | 74 | 1.BFM  2.LM  3.BF% | Prediction equations | Hypertension, DM family history, Smoking, Alcohol, Activity, TG, TC, HDL-C, LDL-C and FPG in men; DM family history, Smoking, Alcohol, Activity, SBP, TG, TC, HDL-C and FPG in women. | 1.Men: for every increase of 1 SD:1.18 (1.11-1.25)  Q2 vs. Q1:2.86 (1.12-7.33) Q3 vs. Q1:5.60 (2.27-13.80)  Women: for every increase of 1 SD:1.04 (0.95-1.15)  Q2 vs. Q1:1.38 (0.45-4.23) Q3 vs. Q1:1.08 (0.35-3.37)  2.Men: for every increase of 1 SD:1.10 (1.03-1.17)  Q2 vs. Q1:1.21 (0.54-2.70) Q3 vs. Q1:2.27 (1.11-4.63)  Women: for every increase of 1 SD:0.92 (0.81-1.05)  Q2 vs. Q1:1.33 (0.49-3.61) Q3 vs. Q1:0.62 (0.19-2.05)  3.Men: for every increase of 1 SD:1.25 (1.14-1.36)  Q2 vs. Q1:5.19 (1.77-15.20) Q3 vs. Q1:7.67 (2.64-22.35)  Women: for every increase of 1 SD:1.34 (1.15-1.57)  Q2 vs. Q1:1.95 (0.49-7.66) Q3 vs. Q1:2.39 (0.63-9.1) |
| Mat  202246 | Malaysia  (Asia) | Cross-sectional study | 1,085 | 492 | PhA | BIA | Age, BMI, Waist to hip ratio, C-reactive protein, Albumin level, High Blood Pressure, Cholesterol, Chronic Kidney Disease, Heart disease, and Stroke. | For every increase of 1 unit:  Men:0.68 (0.52-0.89) Women:0.84 (0.65-1.10)  Men:  Q1 vs. Q3:2.21 (1.21-4.04) Q2 vs. Q3:1.54 (0.90-2.64)  Women:  Q1 vs. Q3:1.31 (0.84-2.05) Q2 vs. Q3:1.04 (0.68-1.59) |
| Haines 202240 | United States (North America) | Cross-sectional study | 1,764 | 91 | ALM/Weight | DXA | Age, Race, Height, Smoking, Education, android/gynoid fat, Physical inactivity. | For every decrease of 1 unit:1.14 (1.05-1.24) |
| Zhang  202224 | China  (Asia) | Cohort study | 5,595 | 282 | BF% | BIA | Age, Income level, Education level, Urbanized index, Residence, Smoking, Alcohol drinking, Physical activity Sleep duration, TEI, Percentage of total energy comes from total energy, Dietary fiber, Calcium, Magnesium, Vitamin C intake. | Men:  Q2 vs. Q1:0.92 (0.44-1.94) Q3 vs. Q1:2.03 (1.09-3.79)  Q4 vs. Q1:2.56 (1.46-4.48) Q5 vs. Q1:2.16 (1.22-3.82)  Women:  Q2 vs. Q1:1.55 (0.86-2.77) Q3 vs. Q1:1.07 (0.57-2.01)  Q4 vs. Q1:1.56 (0.86-2.85) Q5 vs. Q1:1.92 (1.14-3.24) |
| Kim  202215 | Korea  (Asia) | Cohort study | 10,882 | 730 | VFA | BIA | Age, Smoking, Alcohol consumption, Regular aerobic exercise, Regular resistance exercise, Hypertension, Use of lipid-lowering medication, Family history of T2DM and Menopausal status (only adjusted in women), BMI, Homeostasis model assessment of insulin resistance, Fasting glucose. | Men:  Q2 vs. Q1:1.84 (1.25-2.69)  Q3 vs. Q1:2.25 (1.54-3.30)  Q4 vs. Q1:2.62 (1.73-3.97)  Women:  Q2 vs. Q1:5.74 (1.26-26.14)  Q3 vs. Q1:14.02 (3.25-60.49)  Q4 vs. Q1:32.49 (7.42-142.02) |
| Haines 202326 | United States (North America) | Cohort study | 1,893 | 141 | ALM/Weight | DXA | Age, Race, Smoking, Education, Physical activity, WC. | For every increase of 1 SD:  Men:1.07 (0.82-1.41)  Women:1.10 (0.83-1.46) |
| He  202334 | China  (Asia) | Cross-sectional study | 8,680 | 1,461 | SMI | Prediction equation | Age, Sex, Education, Smoking, Alcohol intake, BMI, WC, SBP, DBP, TC, TG, HDL-C, LDL-C, CRP. | Q1 vs. Q3:1.260 (1.025-1.548)  Q2 vs. Q3:1.203 (1.018-1.421) |
| Jun  202328 | Korea  (Asia) | Cohort study | 36,304 | 3,299 | SMI | BIA | Age, Sex, WC, Systolic BP, LDL cholesterol, Smoking status, Frequent exercise. | Q1 vs. Q3:1.31 (1.18-1.45)  Q2 vs. Q3:1.18 (1.08-1.28)  For every decrease of 1 unit:1.05 (1.03-1.07) |
| An  202437 | China  (Asia) | Cross-sectional study | 341 | 68 | VFA | MRI | Age, Sex, BMI, VAT FF, HFF. | For every increase of 1 unit:1.005 (1.001-1.010) |
| Liu  202439 | United States (North America) | Cross-sectional study | 10,085 | 1,135 | FMI | Prediction equation | Age, Sex, Race, Hypertension status, Sleep status, Education degree, Smoking state, Alcohol use status, Physical activity status, Creatinine, C-reactive protein, Triglyceride, HDL, LDL, the FFMI and the FMI were mutually adjusted. | For every increase of 1 unit:1.08 (1.04-1.12) |
| Tang  202433 | Japan  (Asia) | Cohort study | 15,453 | 373 | 1.BFM  2.LM  3.BF% | Prediction equation | Age, Smoking, Alcohol consumption, Physical activity, ALT, AST, GGT, HDL, TC, TG, HbA1c, FBP, SBP, DBP. | 1.Men: For every increase of 1 unit: 1.05 (1.03-1.07)  Q2 vs. Q1: 0.82 (0.56-1.19)  Q3 vs. Q1: 1.25 (0.88-1.79)  Women: For every increase of 1 unit: 1.11 (1.07-1.16)  Q2 vs. Q1: 1.76 (0.78-3.98)  Q3 vs. Q1: 2.52 (1.15-5.55)  2.Men: For every increase of 1 unit: 1.04 (1.01-1.07)  Q2 vs. Q1: 0.76 (0.54-1.07)  Q3 vs. Q1: 1.13 (0.83-1.56)  Women: For every increase of 1 unit: 1.03 (0.98-1.07)  Q2 vs. Q1: 1.10 (0.60-2.02)  Q3 vs. Q1: 1.40 (0.79-2.49)  3.Men: For every increase of 1 unit: 1.11 (1.07-1.16)  Q2 vs. Q1: 1.03 (0.67-1.58)  Q3 vs. Q1: 1.52 (0.99-2.33)  Women: For every increase of 1 unit: 1.18 (1.11-1.26)  Q2 vs. Q1: 1.58 (0.72-3.48)  Q3 vs. Q1: 2.21 (1.03-4.73) |
| Kim  202416 | Korea  (Asia) | Cohort study | 1,607,508 | 144,965 | 1.ASM/BMI  2.BFM/BMI  3.LM/BMI | Prediction equation | Age, BMI, Household income, Smoking, Alcohol consumption, Regular exercise, Fasting serum glucose, Hypertension, Dyslipidemia, Atrial fibrillation, Estimated glomerular filtration rate, Charlson comorbidity index. | For every increase of 1 unit:  1.Men:0.866 (0.830-0.903) Women:0.748 (0.635-0.881)  2.Men:1.073 (1.050-1.096) Women:1.114 (1.047-1.186)  3.Men:0.931 (0.912-0.952) Women:0.906 (0.856-0.959) |
| Bibi  202536 | Germany (Europe) | Cross-sectional study | 4,043 | 654 | 1.BFM  2.BF%  3.VAT | BIA | Age, Sex, Smoking, Physical activity. | For every increase of 1 SD:  1.Men:1.07 (1.05-1.09) Women:1.06 (1.05-1.08)  2.Men:1.81 (1.46-2.24) Women:2.22 (1.82-2.70)  3.Men:1.50 (1.19-1.89) Women:3.02 (2.11-4.32) |

**Notes:** Effect estimates were fully extracted based on the type of body composition variables (continuous or categorical), and the effect estimates obtained from the most comprehensively adjusted model were selected.

**Abbreviations:** OR, odds ratio; HR, hazard ratio; RR, relative ratio; CI, confidence interval; SD, standard deviation; BFM, body fat mass; BF%, body fat percentage; TFM, trunk fat mass; TF%, trunk fat percentage; LFM, leg fat mass; LF%, leg fat percentage; FMI, fat mass index; VAT, visceral adipose tissue; VFA, visceral fat area; LM, lean mass; SMI, skeletal muscle mass index; FMR, fat-to-muscle mass ratio; ALM, appendicular lean mass; ASM, appendicular skeletal muscle; MMI, muscle mass index; PhA, Phase Angle; BIA, bioelectrical impedance analysis; DXA, dual-energy X-ray absorptiometry; MRI, magnetic resonance imaging; CT, computed tomography; TG, triglyceride; TC, total cholesterol; HDL-C, high-density lipoprotein cholesterol; LDL-C, low-density lipoprotein cholesterol; FPG, fasting plasma glucose; DM, diabetes mellitus; HbA1c, hemoglobin A1c; DBP, diastolic blood pressure; SBP, systolic blood pressure; BMI, body mass index; WC, waist circumference; HOMR-IR, homeostasis model assessment of insulin resistance; HOMA-β, homeostasis model assessment of β-cell function; CRP, C-reactive protein; ALT, alanine aminotransferase; AST, aspartate aminotransferase; GGT, g-glutamyl transferase; IFG, impaired fasting glucose; HFF, hepatic fat fraction; VAT FF, visceral adipose tissue fat fraction; FFMI, fat-free mass index; TEI, total energy intake.

**Table S5** The quality results of cross-sectional studies according to AHRQ

| **Study** | **Q1** | **Q2** | **Q3** | **Q4** | **Q5** | **Q6** | **Q7** | **Q8** | **Q9** | **Q10** | **Q11** | **Quality score** |
| --- | --- | --- | --- | --- | --- | --- | --- | --- | --- | --- | --- | --- |
| Lv 201738 | 1 | 1 | 1 | 0 | 0 | 1 | 1 | 1 | 0 | 1 | 1 | 8 |
| Choi 201745 | 1 | 1 | 1 | 1 | 0 | 0 | 1 | 1 | 0 | 0 | 1 | 7 |
| Gamboa-Gómez 201947 | 1 | 1 | 1 | 1 | 0 | 0 | 1 | 1 | 0 | 1 | 0 | 7 |
| Chi 201941 | 1 | 1 | 1 | 1 | 0 | 1 | 1 | 1 | 0 | 0 | 1 | 8 |
| Han 201942 | 1 | 1 | 1 | 1 | 0 | 0 | 1 | 1 | 0 | 0 | 1 | 7 |
| Escobedo-de la Peña 202043 | 1 | 1 | 0 | 0 | 0 | 0 | 1 | 1 | 0 | 1 | 1 | 6 |
| Chen 202044 | 1 | 1 | 1 | 1 | 0 | 0 | 0 | 1 | 0 | 0 | 1 | 6 |
| Cheng 202149 | 1 | 1 | 1 | 0 | 0 | 0 | 1 | 1 | 0 | 1 | 1 | 7 |
| Yokokawa 202135 | 1 | 1 | 1 | 1 | 0 | 1 | 1 | 1 | 0 | 0 | 1 | 8 |
| Chiba 202148 | 1 | 1 | 0 | 1 | 0 | 0 | 1 | 1 | 0 | 1 | 1 | 7 |
| Mat 202246 | 1 | 1 | 1 | 1 | 0 | 1 | 1 | 1 | 0 | 0 | 0 | 7 |
| Haines 202240 | 1 | 1 | 1 | 1 | 0 | 0 | 1 | 1 | 1 | 0 | 1 | 8 |
| He Yunyun 202334 | 1 | 1 | 1 | 1 | 0 | 1 | 1 | 1 | 0 | 0 | 1 | 8 |
| An 202437 | 1 | 1 | 1 | 0 | 1 | 1 | 1 | 1 | 0 | 0 | 1 | 9 |
| Liu 202439 | 1 | 1 | 1 | 1 | 0 | 0 | 1 | 1 | 0 | 1 | 1 | 8 |
| Bibi 202536 | 1 | 1 | 1 | 1 | 0 | 1 | 1 | 1 | 0 | 1 | 1 | 9 |

**Notes:** Q1. Define the source of information (survey, record review); Q2. List inclusion and exclusion criteria for exposed and unexposed subjects (cases and controls) or refer to previous publications; Q3. Indicate time period used for identifying patients; Q4. Indicate whether or not subjects were consecutive if not population-based; Q5. Indicate if evaluators of subjective components of study were masked to other aspects of the status of the participants; Q6. Describe any assessments undertaken for quality assurance purposes (e.g., test/retest of primary outcome measurements); Q7. Explain any patient exclusions from analysis; Q8. Describe how confounding was assessed and/or controlled; Q9. If applicable, explain how missing data were handled in the analysis; Q10. Summarize patient response rates and completeness of data collection; Q11. Clarify what follow-up, if any, was expected and the percentage of patients for which incomplete data or follow-up was obtained.

If the studies met the criteria, it would receive 1 point; otherwise, it would receive 0 points. The studies were categorized into low level (0-3 points), medium level (4-7 points), and high level (8-11 points).

**Table S6** The quality results of cohort studies according to NOS

| **Study** | **Selection** | | | | **Comparability** | **Outcome** | | | **Quality  score** |
| --- | --- | --- | --- | --- | --- | --- | --- | --- | --- |
| Representativeness of the Exposed Cohort | Selection of the Non-Exposed Cohort | Ascertainment of Exposure | Demonstration That Outcome of Interest Was Not Present at Start of Study | Comparability of Cohorts on the Basis of the Design or Analysis | Assessment of Outcome | Was Follow-Up Long Enough for Outcomes to Occur | Adequacy of Follow Up of Cohorts |
| Tulloch-Reid 200318 | ★ | ★ | ★ | ★ | ★ | ★ | ★ | / | 7★ |
| Ley 200914 | ★ | ★ | ★ | ★ | ★ | ★ | ★ | ★ | 8★ |
| Lee 200917 | / | ★ | ★ | ★ | ★★ | ★ | ★ | / | 7★ |
| Larsen 201632 | / | ★ | ★ | ★ | ★ | / | ★ | / | 5★ |
| Son 201721 | ★ | ★ | ★ | ★ | ★★ | ★ | ★ | ★ | 9★ |
| Hong 201727 | ★ | ★ | ★ | ★ | ★ | ★ | ★ | / | 7★ |
| Tatsukawa 201831 | / | ★ | ★ | ★ | ★ | ★ | ★ | / | 6★ |
| Granados 201820 | ★ | ★ | ★ | / | ★★ | ★ | ★ | / | 7★ |
| Park 201822 | ★ | ★ | / | ★ | ★ | ★ | ★ | ★ | 7★ |
| Lee 201823 | / | ★ | ★ | ★ | ★ | ★ | ★ | ★ | 7★ |
| Kim 201930 | / | / | / | ★ | ★ | ★ | ★ | / | 4★ |
| Zafra-Tanaka 202019 | ★ | ★ | ★ | ★ | ★★ | ★ | ★ | ★ | 9★ |
| Wang 202125 | ★ | / | ★ | ★ | ★★ | ★ | ★ | / | 7★ |
| Liu 202229 | ★ | / | ★ | ★ | ★ | ★ | ★ | / | 6★ |
| Zhang 202224 | ★ | ★ | ★ | ★ | ★★ | ★ | ★ | ★ | 9★ |
| Kim 202215 | ★ | ★ | ★ | ★ | ★★ | ★ | ★ | / | 8★ |
| Haines 202326 | ★ | ★ | ★ | ★ | ★ | ★ | ★ | / | 7★ |
| Jun 202328 | ★ | ★ | ★ | ★ | ★★ | ★ | ★ | / | 8★ |
| Tang 202433 | / | ★ | ★ | ★ | ★★ | ★ | ★ | / | 7★ |
| Kim 202416 | ★ | ★ | ★ | ★ | ★★ | ★ | ★ | ★ | 9★ |

**Notes:** Except for the ''Comparability'' criterion, which awards two stars, all other criteria award one star if met and no stars if not met. The total number of stars across all criteria constitutes the overall research quality score. Studies are classified into three categories: low quality (1-3 stars), moderate quality (4-6 stars), and high quality (7-9 stars).

**
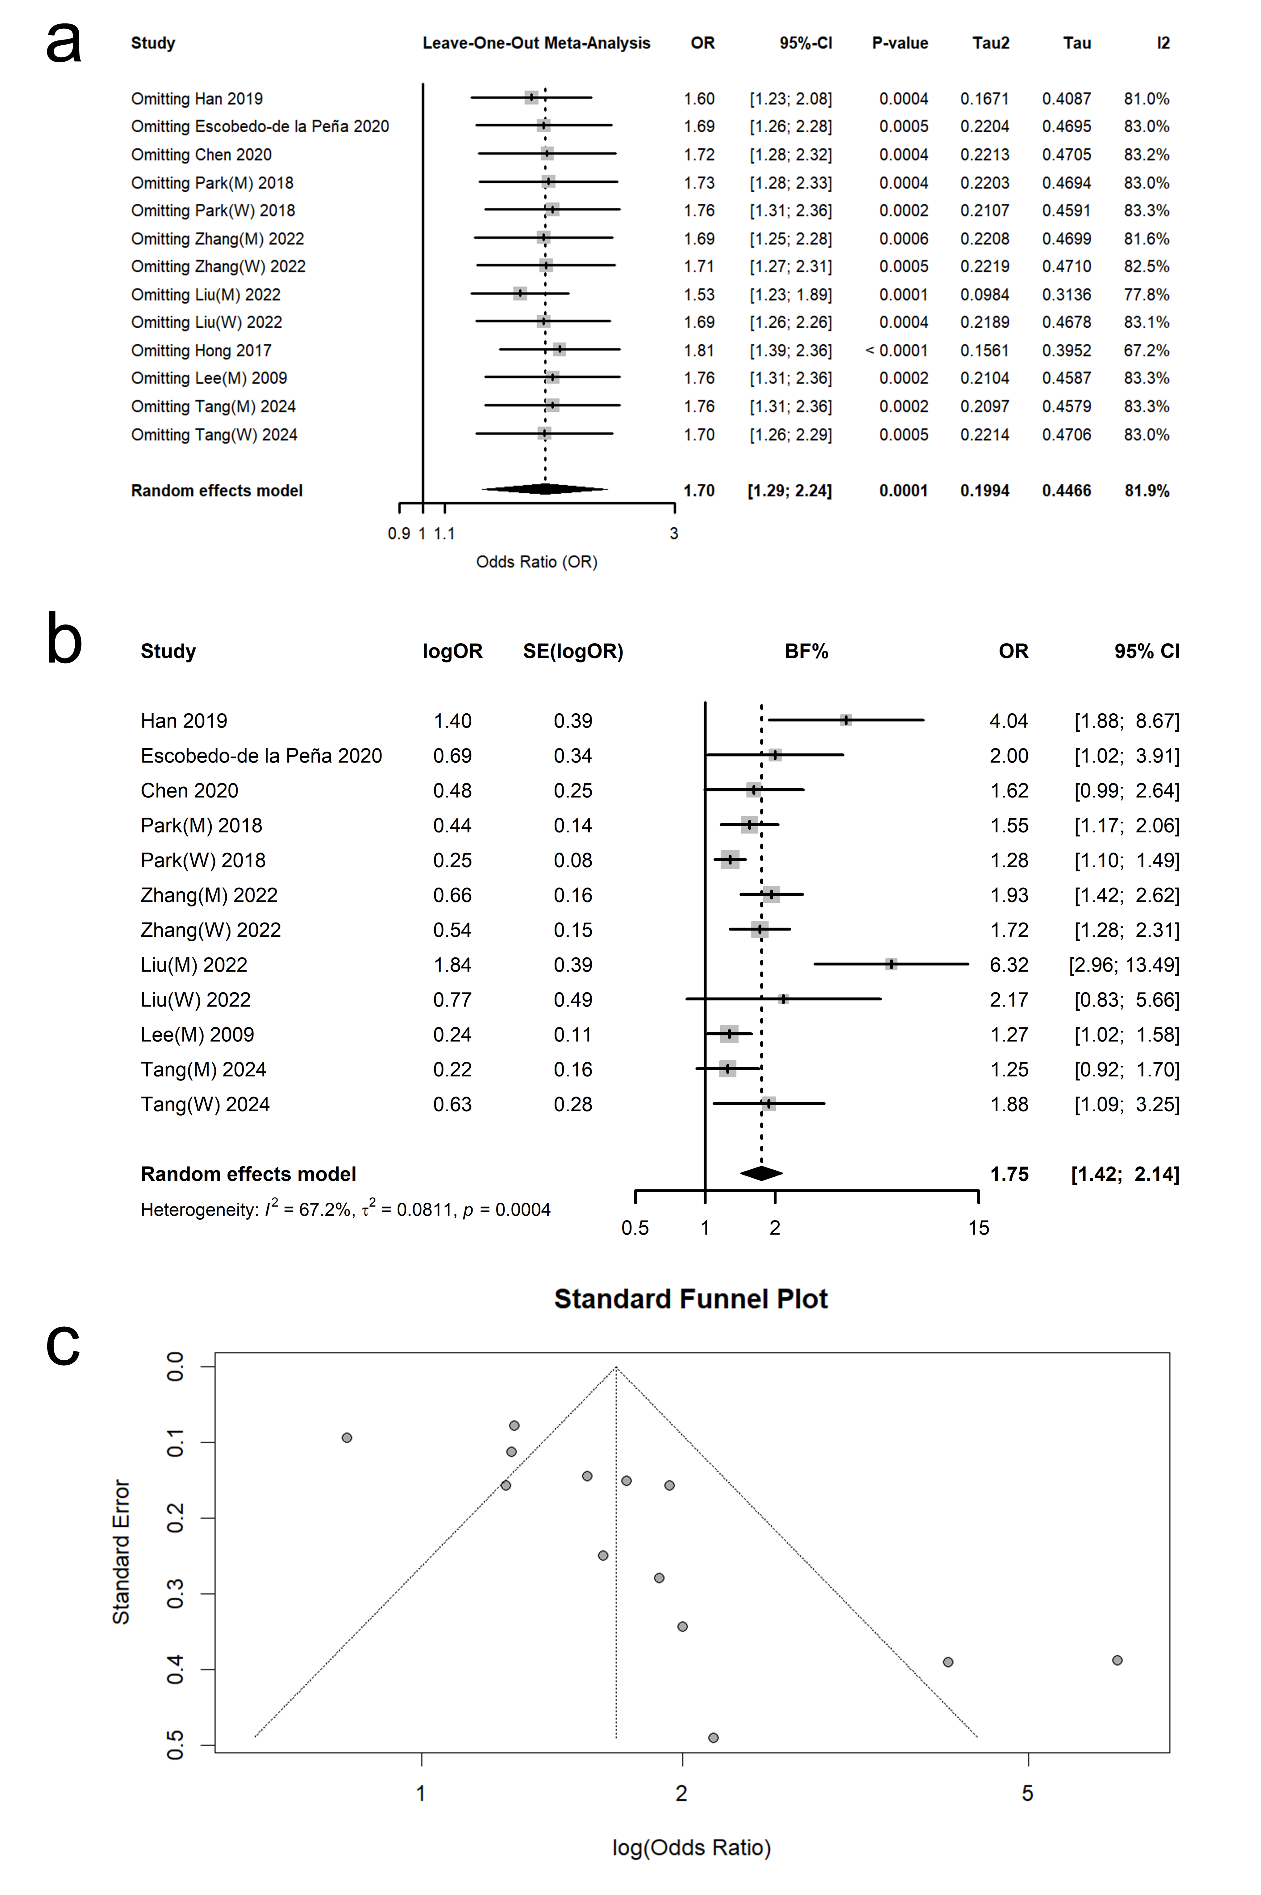
**

**Figure S1** Body fat percentage (BF%): Qhigh vs Qlow. **(a)** Sensitivity analysis. **(b)** Forest plot after excluding studies with heterogeneity. **(c)** Funnel plot. **Notes:** The pooled effect estimates in the forest plots, represented by the diamond, are displayed in bold. The funnel plot symmetry tests suggested possible publication bias.


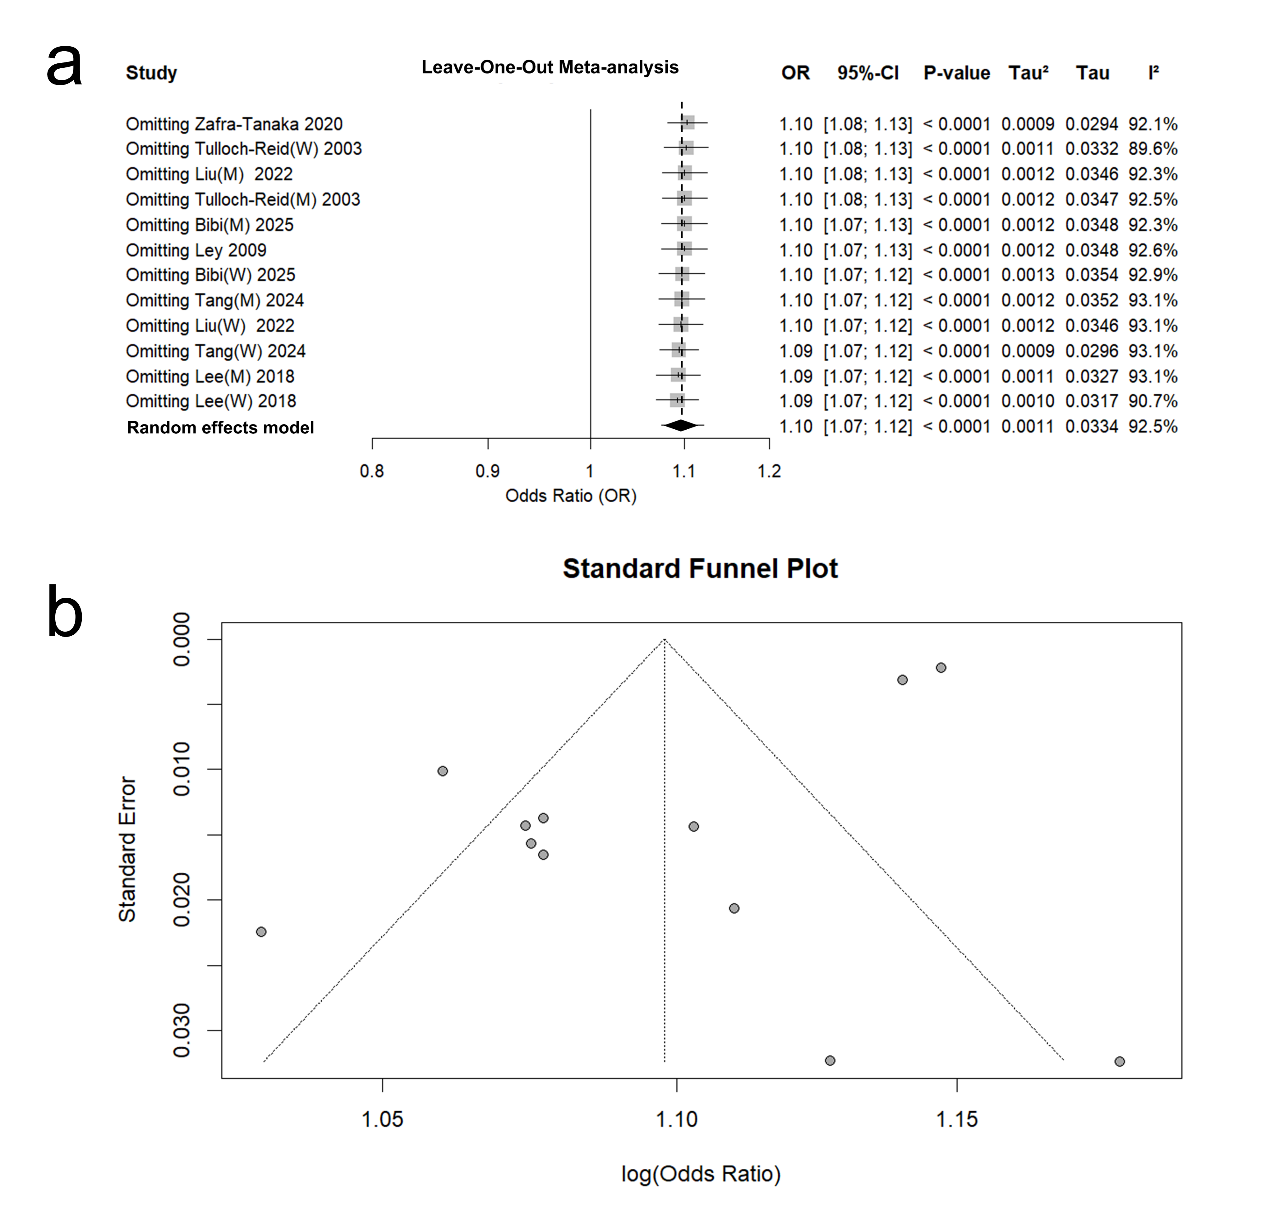


**Figure S2** Body fat percentage (BF%): for every increase of 1 unit. **(a)** Sensitivity analysis. **(b)** Funnel plot. **Notes:** The pooled effect estimates in the forest plots, represented by the diamond, are displayed in bold. The funnel plot symmetry tests suggested possible publication bias.


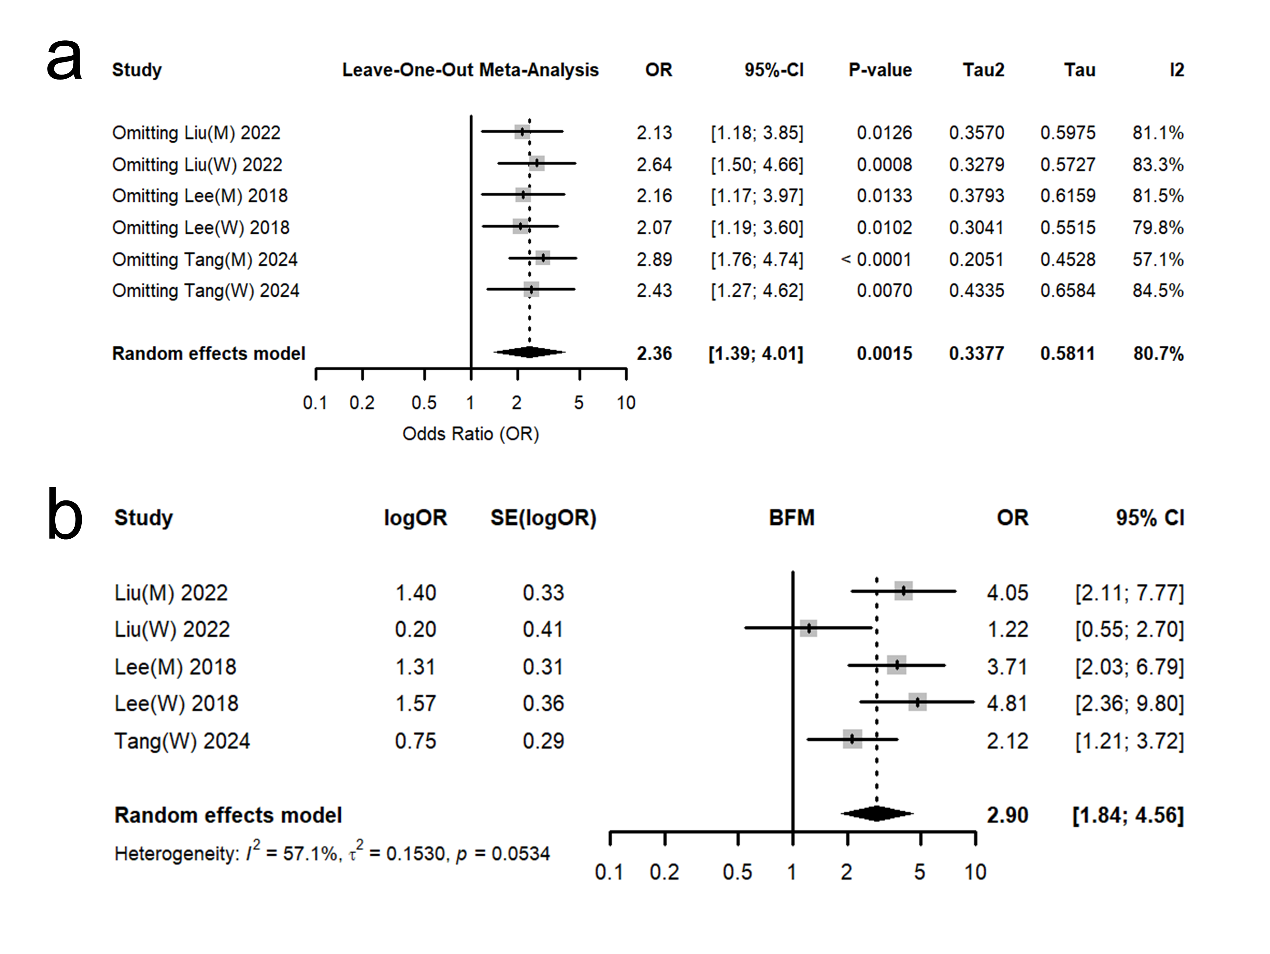


**Figure S3** Body fat mass (BFM): Qhigh vs Qlow. **(a)** Sensitivity analysis. **(b)** Forest plot after excluding studies with heterogeneity. **Notes:** The pooled effect estimates in the forest plots, represented by the diamond, are displayed in bold.


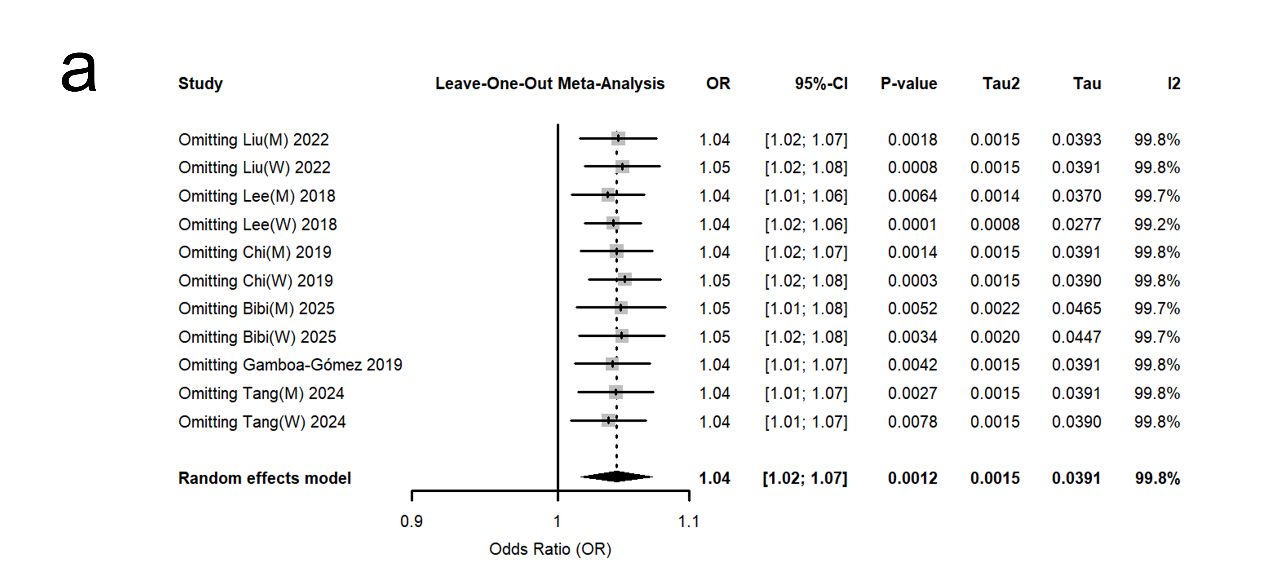


**Figure S4** Body fat mass (BFM): for every increase of 1 unit. **(a)** Sensitivity analysis. **Notes:** The pooled effect estimates in the forest plots, represented by the diamond, are displayed in bold.


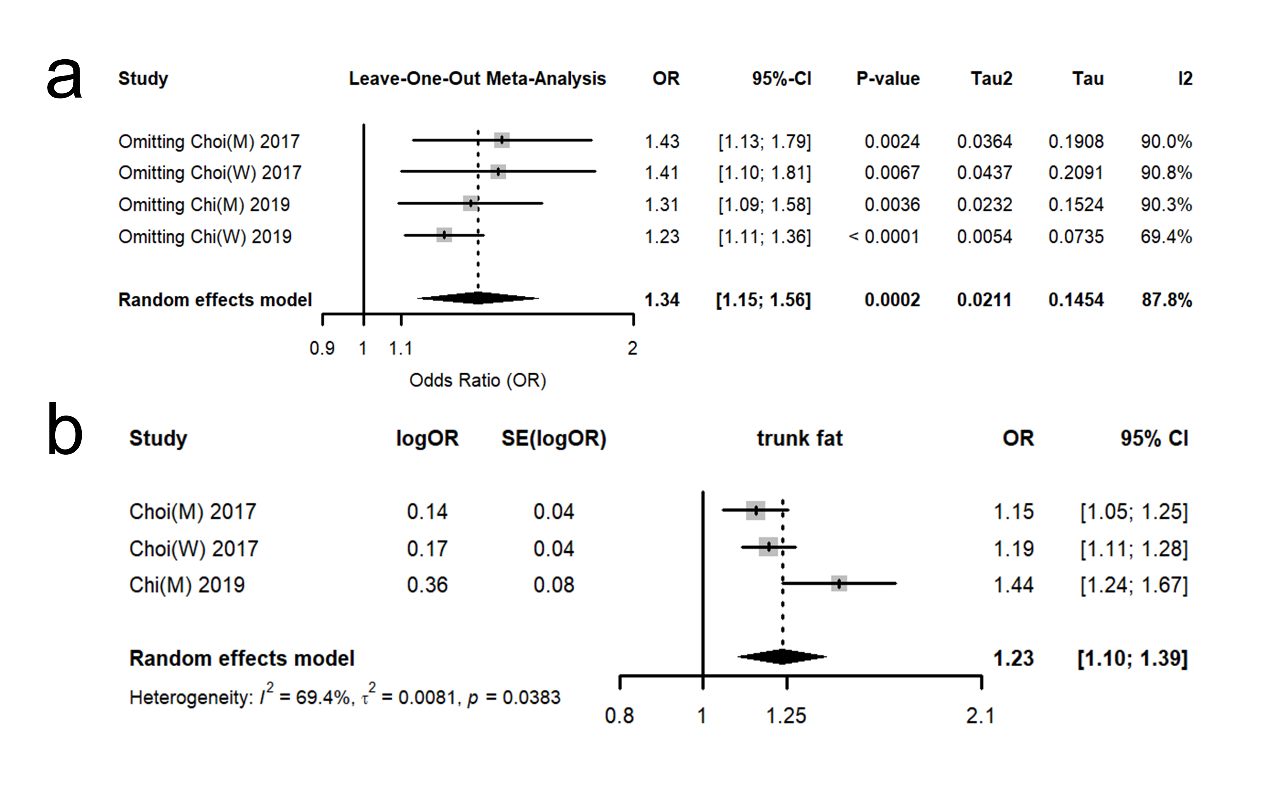


**Figure S5** Trunk fat mass (TFM): for every increase of 1 unit. **(a)** Sensitivity analysis. **(b)** Forest plot after excluding studies with heterogeneity. **Notes:** The pooled effect estimates in the forest plots, represented by the diamond, are displayed in bold.


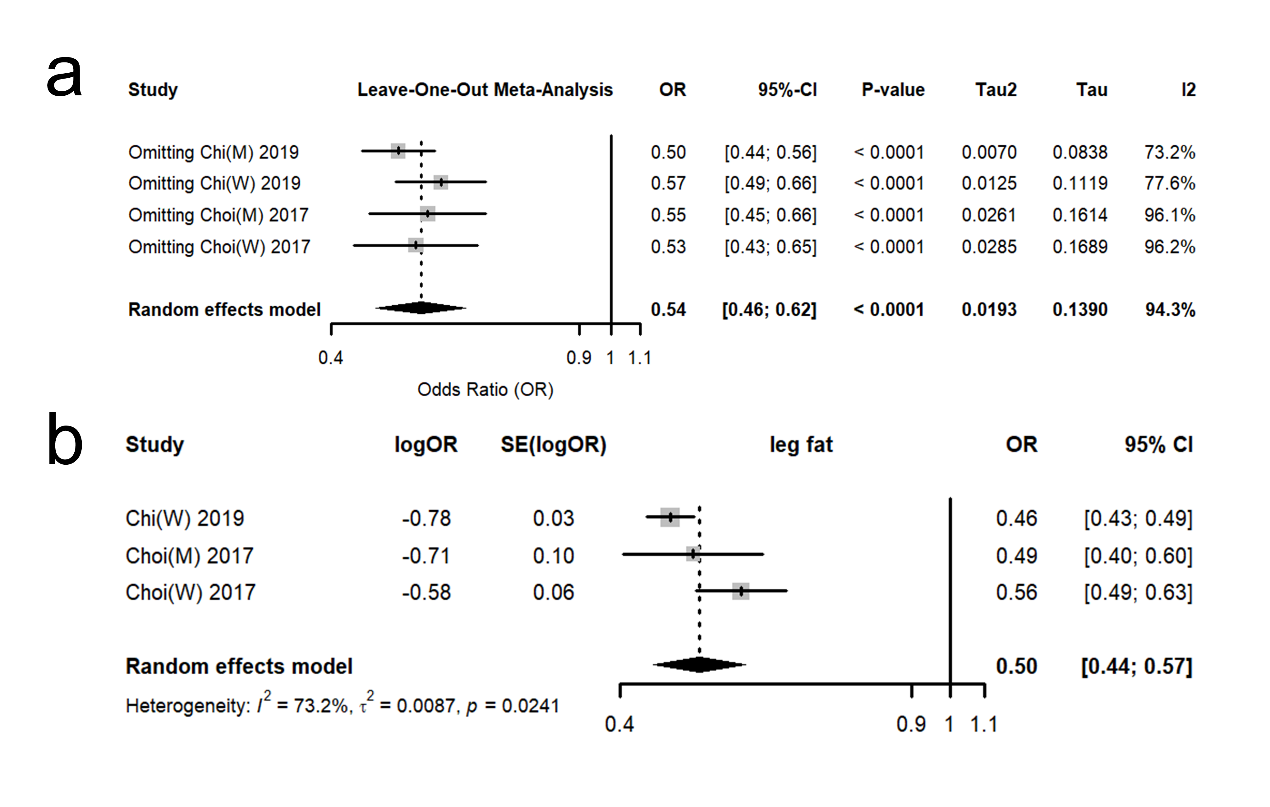


**Figure S6** Leg fat mass (LFM): for every increase of 1 unit. **(a)** Sensitivity analysis. **(b)** Forest plot after excluding studies with heterogeneity. **Notes:** The pooled effect estimates in the forest plots, represented by the diamond, are displayed in bold.


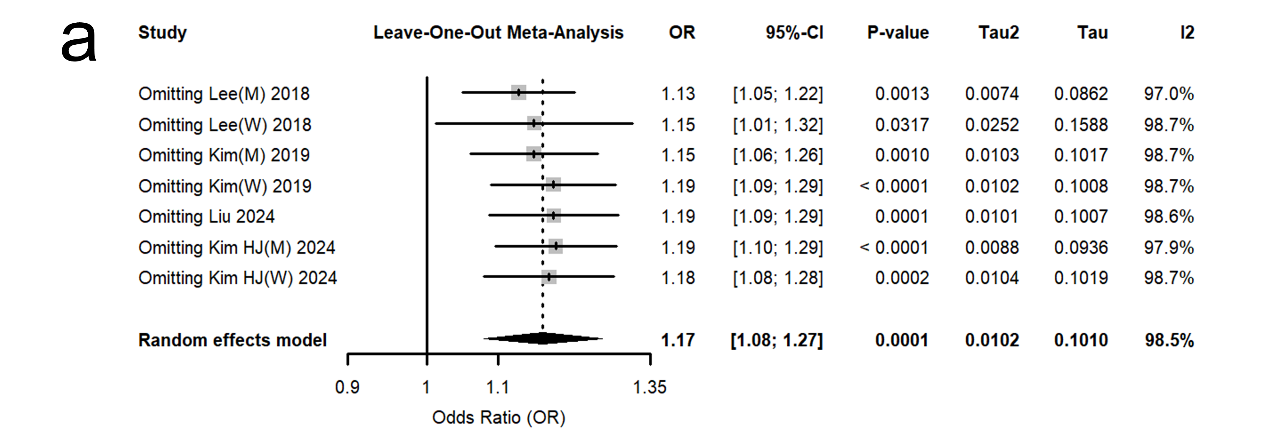


**Figure S7** Fat mass index (FMI): for every increase of 1 unit. **(a)** Sensitivity analysis. **Notes:** The pooled effect estimates in the forest plots, represented by the diamond, are displayed in bold.


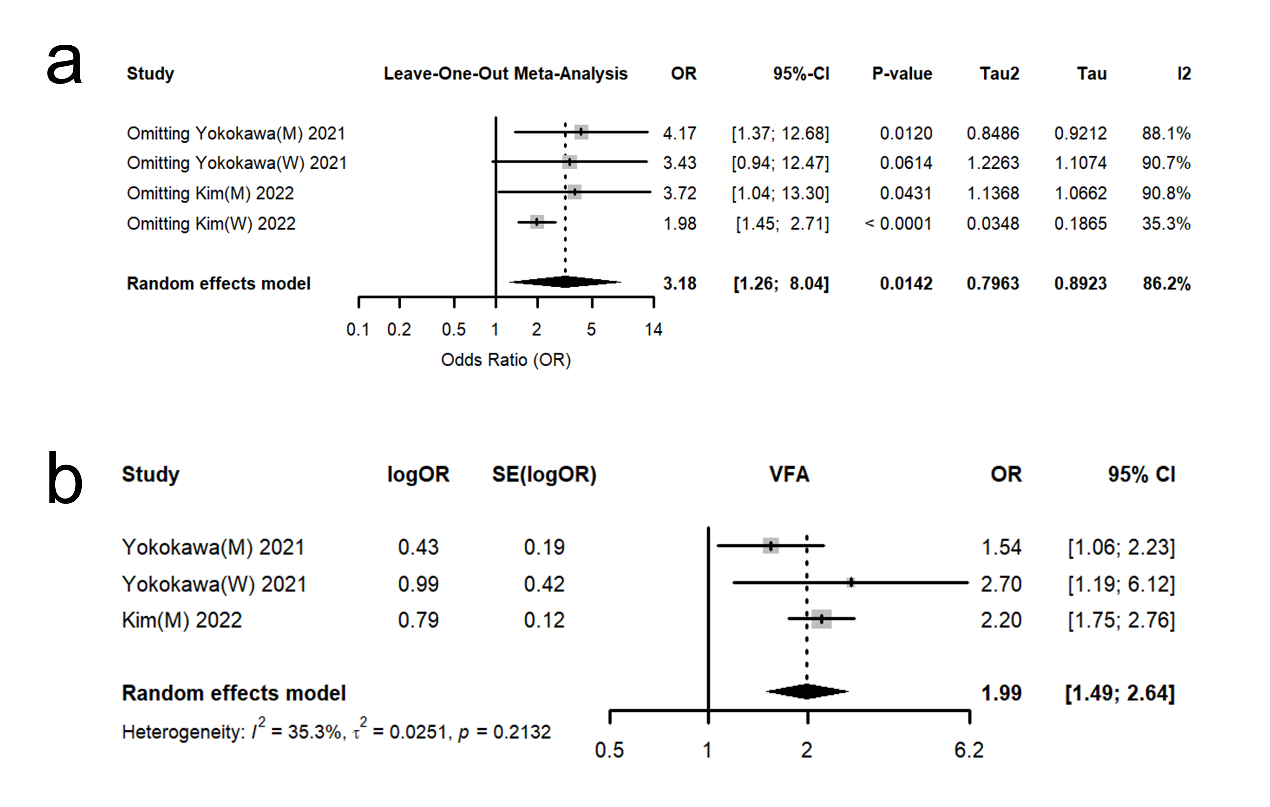


**Figure S8** Visceral fat area (VFA): Qhigh vs Qlow. **(a)** Sensitivity analysis. **(b)** Forest plot after excluding studies with heterogeneity. **Notes:** The pooled effect estimates in the forest plots, represented by the diamond, are displayed in bold.


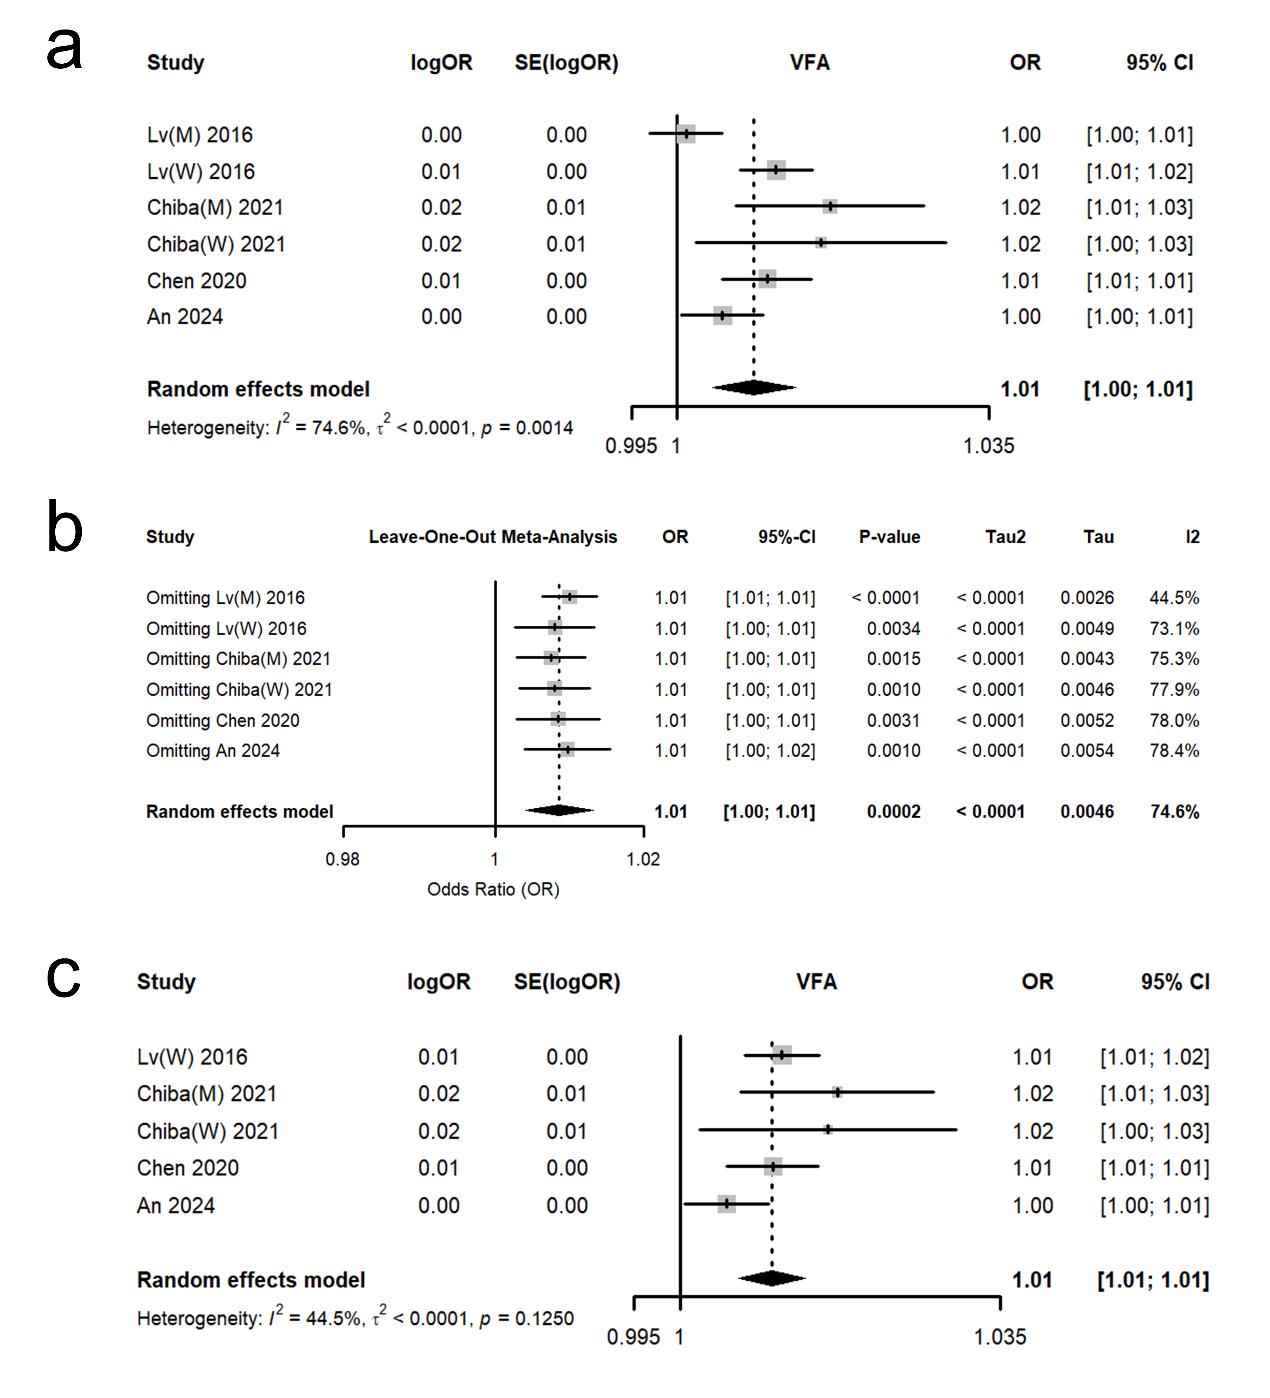


**Figure S9** Visceral fat area (VFA): for every increase of 1 unit**. (a)** Forest plot. (**b)** Sensitivity analysis. **(c)** Forest plot after excluding studies with heterogeneity. **Notes:** The pooled effect estimates in the forest plots, represented by the diamond, are displayed in bold.

**
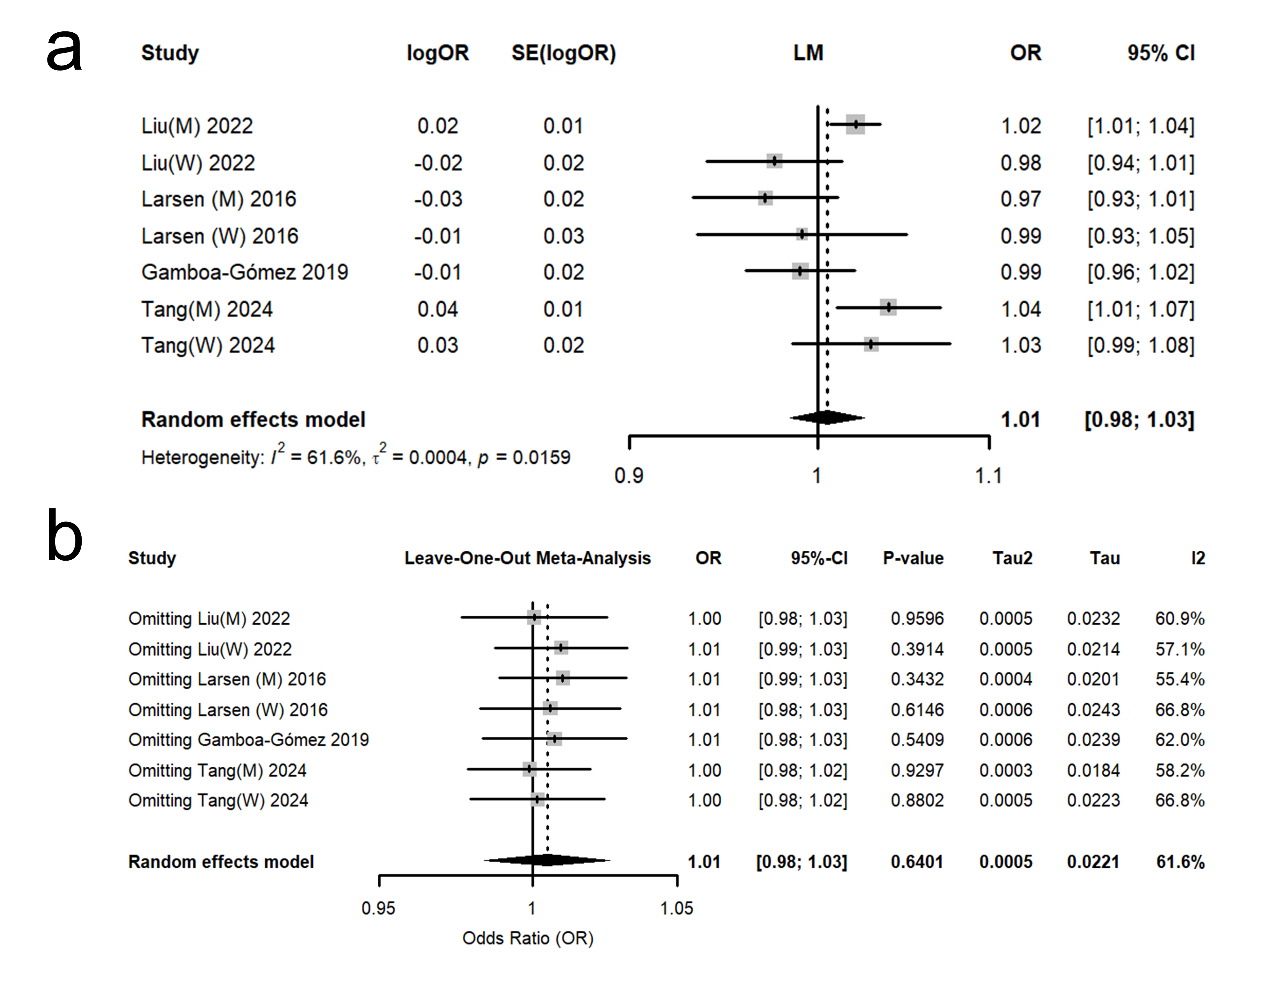
**

**Figure S10** Lean mass (LM): for every increase of 1 unit. **(a)** Forest plot. **(b)** Sensitivity analysis. **Notes:** The pooled effect estimates in the forest plots, represented by the diamond, are displayed in bold.

**
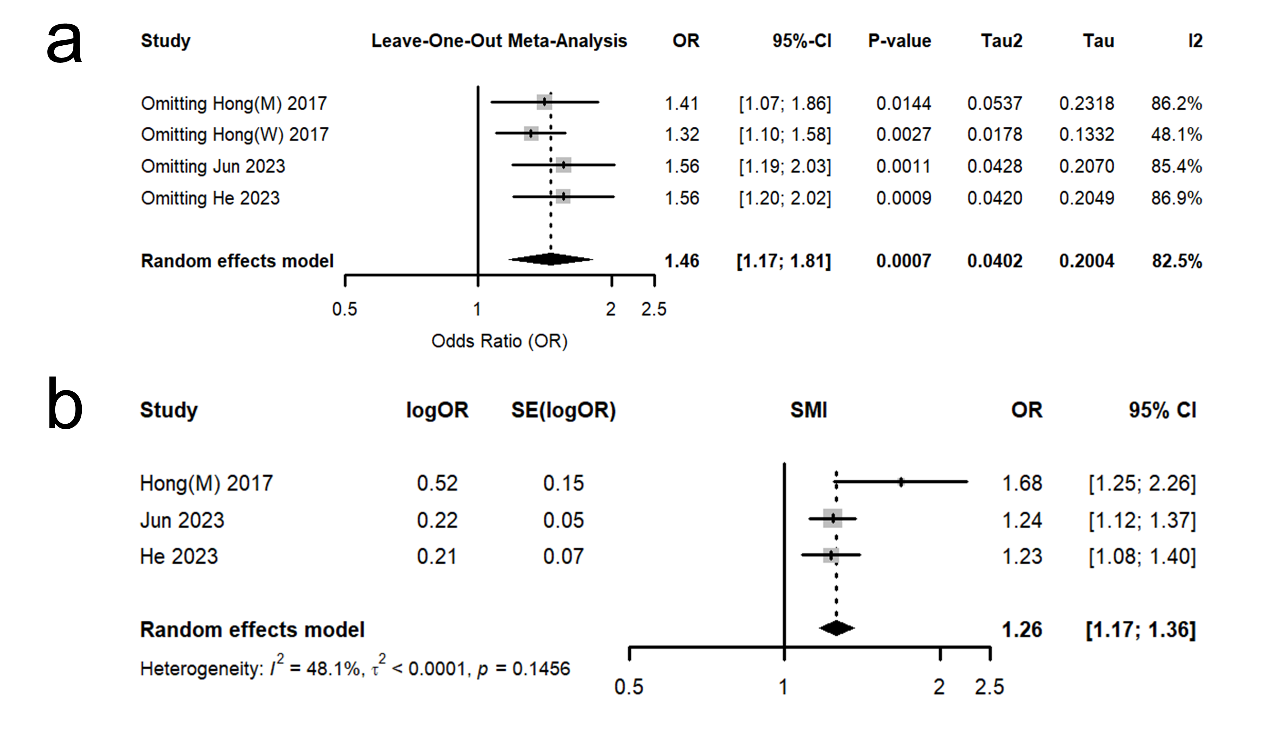
**

**Figure S11** Skeletal muscle mass index (SMI): Qlow vs Qhigh. **(a)** Sensitivity analysis. **(b)** Forest plot after excluding studies with heterogeneity. **Notes:** The pooled effect estimates in the forest plots, represented by the diamond, are displayed in bold.


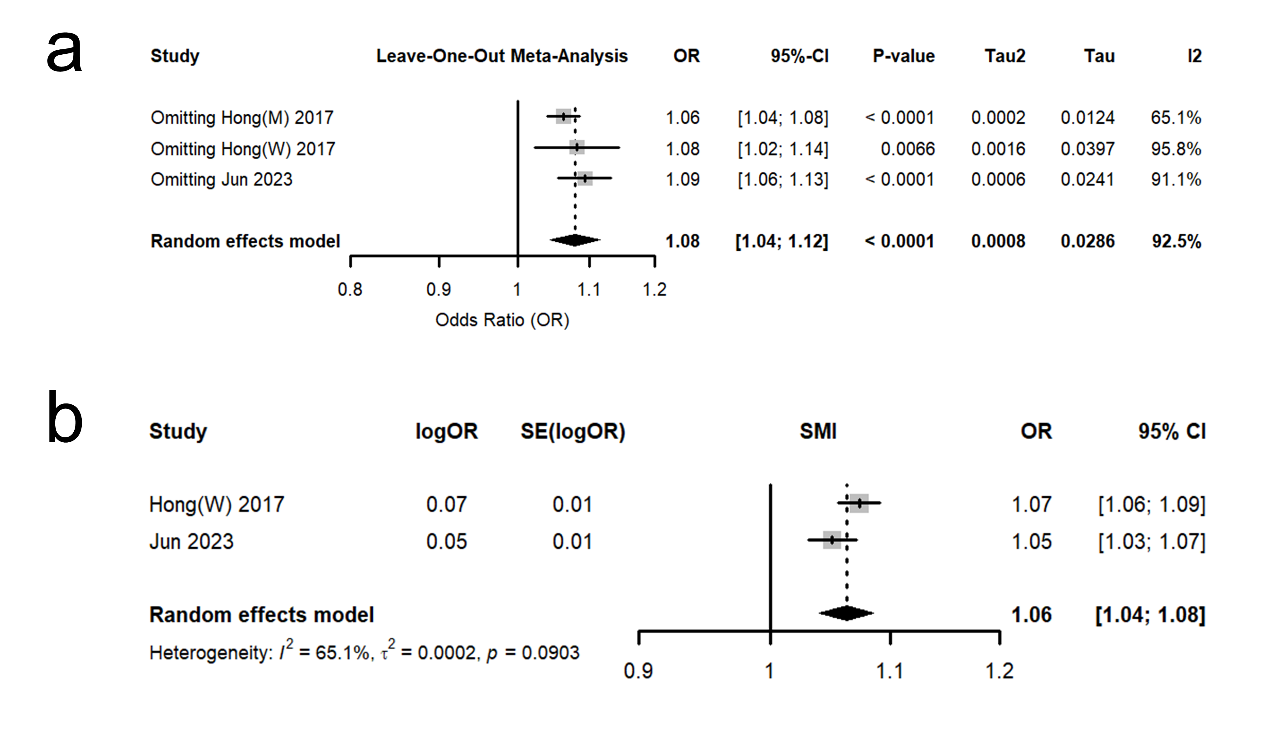


**Figure S12** Skeletal muscle mass index (SMI): for every decrease of 1 unit. **(a)** Sensitivity analysis. **(b)** Forest plot after excluding studies with heterogeneity. **Notes:** The pooled effect estimates in the forest plots, represented by the diamond, are displayed in bold.

**Table S7** Subgroup analyses of outcomes by study type

| **Outcomes** | **NO. of studies** | ***I2*(%)** | ***P*heterogeneity** | ***τ2*** | **OR (95%CI)** | ***P*between** |
| --- | --- | --- | --- | --- | --- | --- |
| BF% (Qhigh vs Qlow) |  |  |  |  |  | 0.2399 |
| Cross-sectional study | 3 | 49.1 | 0.1403 | 0.0997 | 2.21 (1.33-3.68) |  |
| Cohort study | 10 | 83.8 | ＜0.0001 | 0.1482 | 1.57 (1.20-2.05) |  |
| BF% (For every increase of 1 unit) |  |  |  |  |  | 0.5958 |
| Cross-sectional study | 2 | 30.4 | 0.2307 | ＜0.0001 | 1.09 (1.06-1.12) |  |
| Cohort study | 10 | 92.8 | ＜0.0001 | 0.0013 | 1.10 (1.07-1.13) |  |
| BFM (For every increase of 1 unit) |  |  |  |  |  | 0.1434 |
| Cross-sectional study | 5 | 79.6 | 0.0006 | 0.0050 | 1.00 (0.93-1.08) |  |
| Cohort study | 6 | 96.7 | ＜0.0001 | 0.0011 | 1.06 (1.03-1.09) |  |
| FMI (For every increase of 1 unit) |  |  |  |  |  | 0.0654 |
| Cross-sectional study | 1 | Not applicable | Not applicable | Not applicable | 1.08 (1.04-1.12) |  |
| Cohort study | 6 | 98.6 | ＜0.0001 | 0.0115 | 1.18 (1.08-1.30) |  |
| LM (For every increase of 1 unit) |  |  |  |  |  | 0.3642 |
| Cross-sectional study | 1 | Not applicable | Not applicable | Not applicable | 0.99 (0.96-1.02) |  |
| Cohort study | 6 | 62.0 | 0.0218 | 0.0005 | 1.01 (0.98-1.03) |  |
| SMI (Qlow vs Qhigh) |  |  |  |  |  | 0.1274 |
| Cross-sectional study | 1 | Not applicable | Not applicable | Not applicable | 1.23 (1.08-1.40) |  |
| Cohort study | 3 | 86.9 | 0.0005 | 0.0484 | 1.56 (1.18-2.06) |  |

**Abbreviations:** OR, odds ratio; CI, confidence interval; BFM, body fat mass; BF%, body fat percentage; FMI, fat mass index; LM, lean mass; SMI, skeletal muscle mass index.

**Table S8** Subgroup analyses of outcomes by body composition measurement method

| **Outcomes** | **NO. of studies** | ***I2*(%)** | ***P*heterogeneity** | ***τ2*** | **OR (95%CI)** | ***P*between** |
| --- | --- | --- | --- | --- | --- | --- |
| BF% (Qhigh vs Qlow) |  |  |  |  |  | 0.1030 |
| predictive equation | 5 | 80.4 | 0.0004 | 0.3399 | 2.51 (1.39-4.54) |  |
| BIA | 7 | 84.2 | ＜0.0001 | 0.0840 | 1.44 (1.12-1.85) |  |
| hydrodensitometry weighing | 1 | Not applicable | Not applicable | Not applicable | 1.27 (1.02-1.58) |  |
| BF% (For every increase of 1 unit) |  |  |  |  |  | 0.0007 |
| predictive equation | 6 | 80.3 | 0.0001 | 0.0007 | 1.13 (1.10-1.16) |  |
| BIA | 6 | 41.6 | 0.1278 | 0.0001 | 1.07 (1.06-1.09) |  |
| BFM (For every increase of 1 unit) |  |  |  |  |  | ＜0.0001 |
| predictive equation | 6 | 96.7 | ＜0.0001 | 0.0011 | 1.06 (1.03-1.09) |  |
| DXA | 2 | 84.1 | 0.0122 | 0.0329 | 0.91 (0.70-1.20) |  |
| MRI | 2 | 0 | 0.4329 | 0 | 1.01 (1.01-1.01) |  |
| BIA | 1 | Not applicable | Not applicable | Not applicable | 1.08 (1.03-1.13) |  |
| FMI (For every increase of 1 unit) |  |  |  |  |  | 0.2239 |
| predictive equation | 4 | 99.1 | ＜0.0001 | 0.0133 | 1.20 (1.07-1.34) |  |
| BIA | 2 | 78.9 | 0.0297 | 0.0189 | 1.15 (0.93-1.42) |  |
| DXA | 1 | Not applicable | Not applicable | Not applicable | 1.17 (1.08-1.27) |  |

**Abbreviations:** OR, odds ratio; CI, confidence interval; BFM, body fat mass; BF%, body fat percentage; FMI, fat mass index; BIA, bioelectrical impedance analysis; DXA, dual-energy X-ray absorptiometry; MRI, magnetic resonance imaging.

**Table S9** Subgroup analyses of outcomes by gender

| **Outcomes** | **NO. of studies** | ***I2*(%)** | ***P*heterogeneity** | ***τ2*** | **OR (95%CI)** | ***P*between** |
| --- | --- | --- | --- | --- | --- | --- |
| BF% (Qhigh vs Qlow) |  |  |  |  |  | 0.8090 |
| Male | 5 | 80.1 | 0.0005 | 0.2530 | 1.82 (1.13-2.92) |  |
| Female | 4 | 41.5 | 0.1626 | 0.0268 | 1.53 (1.20-1.96) |  |
| BF% (For every increase of 1 unit) |  |  |  |  |  | 0.1402 |
| Male | 5 | 90.8 | ＜0.0001 | 0.0007 | 1.10 (1.07-1.13) |  |
| Female | 5 | 93.9 | ＜0.0001 | 0.0014 | 1.12 (1.08-1.16) |  |
| BFM (Qhigh vs Qlow) |  |  |  |  |  | 0.9594 |
| Male | 3 | 89.2 | ＜0.0001 | 0.5488 | 2.41 (0.98-5.93) |  |
| Female | 3 | 69.8 | 0.0363 | 0.3109 | 2.34 (1.11-4.94) |  |
| BFM (For every increase of 1 unit) |  |  |  |  |  | 0.3295 |
| Male | 5 | 99.6 | ＜0.0001 | 0.0013 | 1.05 (1.01-1.08) |  |
| Female | 5 | 99.9 | ＜0.0001 | 0.0080 | 1.01 (0.93-1.10) |  |
| TFM (For every increase of 1 unit) |  |  |  |  |  | 0.6021 |
| Male | 2 | 84.2 | 0.0118 | 0.0208 | 1.27 (1.03-1.58) |  |
| Female | 2 | 94.4 | ＜0.0001 | 0.0313 | 1.35 (1.12-1.62) |  |
| LFM (For every increase of 1 unit) |  |  |  |  |  | 0.4575 |
| Male | 2 | 84.8 | 0.0104 | 0.0302 | 0.57 (0.44-0.74) |  |
| Female | 2 | 86.5 | 0.0065 | 0.0167 | 0.50 (0.42-0.61) |  |
| FMI (For every increase of 1 unit) |  |  |  |  |  | 0.1623 |
| Male | 3 | 99.4 | ＜0.0001 | 0.0180 | 1.24 (1.06-1.44) |  |
| Female | 3 | 84.7 | ＜0.0001 | 0.0052 | 1.14 (1.04-1.26) |  |
| VFA (Qhigh vs Qlow) |  |  |  |  |  | 0.1643 |
| Male | 2 | 61.4 | 0.1074 | 0.0391 | 1.90 (1.35-2.68) |  |
| Female | 2 | 86.5 | 0.0065 | 1.1705 | 6.11 (1.22-30.65) |  |
| VFA (For every increase of 1 unit) |  |  |  |  |  | 0.0014 |
| Male | 2 | 87.3 | 0.0050 | 0.0001 | 1.01 (0.99-1.02) |  |
| Female | 2 | 0 | 0.5000 | 0 | 1.01 (1.01-1.02) |  |
| LM (For every increase of 1 unit) |  |  |  |  |  | 0.6216 |
| Male | 3 | 73.0 | 0.0248 | 0.0008 | 1.01 (0.98-1.05) |  |
| Female | 3 | 40.6 | 0.1860 | 0.0004 | 1.00 (0.96-1.03) |  |

**Abbreviations:** OR, odds ratio; CI, confidence interval; BFM, body fat mass; BF%, body fat percentage; TFM, trunk fat mass; LFM, leg fat mass; FMI, fat mass index; VFA, visceral fat area; LM, lean mass.

**Table S10** Subgroup analyses of outcomes by region

| **Outcomes** | **NO. of studies** | ***I2*(%)** | ***P*heterogeneity** | ***τ2*** | **OR (95% CI)** | ***P*between** |
| --- | --- | --- | --- | --- | --- | --- |
| BF% (Qhigh vs Qlow) |  |  |  |  |  | 0.0525 |
| Europe | 1 | Not applicable | Not applicable | Not applicable | 4.04 (1.88-8.67) |  |
| Northern America | 2 | 37.2 | 0.2070 | 0.0384 | 1.42 (0.97-2.08) |  |
| Asia | 10 | 84.0 | ＜0.0001 | 0.1505 | 1.61 (1.22-2.12) |  |
| BF% (For every increase of 1 unit) |  |  |  |  |  | 0.0464 |
| Europe | 2 | 30.4 | 0.2307 | ＜0.0001 | 1.09 (1.06-1.12) |  |
| Northern America | 5 | 95.3 | ＜0.0001 | 0.0013 | 1.10 (1.07-1.14) |  |
| Asia | 4 | 63.8 | 0.0406 | 0.0009 | 1.11 (1.07-1.16) |  |
| South America | 1 | Not applicable | Not applicable | Not applicable | 1.03 (0.99-1.08) |  |
| BFM (For every increase of 1 unit) |  |  |  |  |  | ＜0.0001 |
| Europe | 2 | 0 | 0.4329 | 0 | 1.01 (1.01-1.01) |  |
| Northern America | 3 | 97.0 | ＜0.0001 | 0.0002 | 1.09 (1.07-1.11) |  |
| Asia | 6 | 82.9 | ＜0.0001 | 0.0038 | 1.03 (0.97-1.09) |  |
| FMI (For every increase of 1 unit) |  |  |  |  |  | 0.2622 |
| Northern America | 3 | 99.1 | ＜0.0001 | 0.0157 | 1.23 (1.06-1.41) |  |
| Asia | 4 | 71.8 | 0.0139 | 0.0043 | 1.12 (1.03-1.21) |  |
| LM (For every increase of 1 unit) |  |  |  |  |  | 0.0448 |
| Northern America | 3 | 0 | 0.7327 | 0 | 0.98 (0.96-1.01) |  |
| Asia | 4 | 58.0 | 0.0673 | 0.0004 | 1.02 (0.99-1.04) |  |

**Abbreviations:** OR, odds ratio; CI, confidence interval; BFM, body fat mass; BF%, body fat percentage; FMI, fat mass index; LM, lean mass.
